# Supplementary material for: Synthesis and Evaluation of 5-(Heteroarylmethylene)hydantoins as Glycogen Synthase Kinase-3β Inhibitors
Source: MDPI journal article supplement (doi:10.3390/ph17050570), 2024-04-29
Supplement: s1 [file s1]

Supplementary Material for

**Synthesis and Evaluation of 5-(Heteroaryl-methylene)hydantoins as Glycogen Synthase Kinase-3 $\beta$  Inhibitors**

Nicholas O. Schneider, Kendra Gilreath, Daniel J. Burkett, Martin St. Maurice and William A. Donaldson

**This document includes:**

|                                                                          |     |
|--------------------------------------------------------------------------|-----|
| <sup>1</sup> H NMR spectrum of <b>17</b> ( <i>d</i> <sub>6</sub> -DMSO)  | S2  |
| <sup>13</sup> C NMR spectrum of <b>17</b> ( <i>d</i> <sub>6</sub> -DMSO) | S3  |
| <sup>1</sup> H NMR spectrum of <b>18</b> ( <i>d</i> <sub>6</sub> -DMSO)  | S4  |
| <sup>1</sup> H NMR spectrum of <b>19</b> ( <i>d</i> <sub>6</sub> -DMSO)  | S5  |
| <sup>13</sup> C NMR spectrum of <b>19</b> ( <i>d</i> <sub>6</sub> -DMSO) | S6  |
| <sup>1</sup> H NMR spectrum of <b>15</b> ( <i>d</i> <sub>6</sub> -DMSO)  | S7  |
| <sup>13</sup> C NMR spectrum of <b>15</b> ( <i>d</i> <sub>6</sub> -DMSO) | S8  |
| <sup>1</sup> H NMR spectrum of <b>20</b> ( <i>d</i> <sub>6</sub> -DMSO)  | S9  |
| <sup>13</sup> C NMR spectrum of <b>20</b> ( <i>d</i> <sub>6</sub> -DMSO) | S10 |
| <sup>1</sup> H NMR spectrum of <b>21</b> ( <i>d</i> <sub>6</sub> -DMSO)  | S11 |
| <sup>13</sup> C NMR spectrum of <b>21</b> ( <i>d</i> <sub>6</sub> -DMSO) | S12 |
| <sup>1</sup> H NMR spectrum of <b>22</b> ( <i>d</i> <sub>6</sub> -DMSO)  | S13 |
| <sup>13</sup> C NMR spectrum of <b>22</b> ( <i>d</i> <sub>6</sub> -DMSO) | S14 |
| <sup>1</sup> H NMR spectrum of <b>23</b> ( <i>d</i> <sub>6</sub> -DMSO)  | S15 |
| <sup>13</sup> C NMR spectrum of <b>23</b> ( <i>d</i> <sub>6</sub> -DMSO) | S16 |
| <sup>1</sup> H NMR spectrum of <b>24</b> ( <i>d</i> <sub>6</sub> -DMSO)  | S17 |
| <sup>13</sup> C NMR spectrum of <b>24</b> ( <i>d</i> <sub>6</sub> -DMSO) | S18 |
| <sup>1</sup> H NMR spectrum of <b>25</b> ( <i>d</i> <sub>6</sub> -DMSO)  | S19 |
| <sup>13</sup> C NMR spectrum of <b>25</b> ( <i>d</i> <sub>6</sub> -DMSO) | S20 |
| <sup>1</sup> H NMR spectrum of <b>26</b> ( <i>d</i> <sub>6</sub> -DMSO)  | S21 |
| <sup>13</sup> C NMR spectrum of <b>26</b> ( <i>d</i> <sub>6</sub> -DMSO) | S22 |
| <sup>1</sup> H NMR spectrum of <b>27</b> ( <i>d</i> <sub>6</sub> -DMSO)  | S23 |
| <sup>13</sup> C NMR spectrum of <b>27</b> ( <i>d</i> <sub>6</sub> -DMSO) | S24 |
| <sup>1</sup> H NMR spectrum of <b>28</b> ( <i>d</i> <sub>6</sub> -DMSO)  | S25 |
| <sup>13</sup> C NMR spectrum of <b>28</b> ( <i>d</i> <sub>6</sub> -DMSO) | S26 |
| <sup>1</sup> H NMR spectrum of <b>29</b> ( <i>d</i> <sub>6</sub> -DMSO)  | S27 |
| <sup>13</sup> C NMR spectrum of <b>29</b> ( <i>d</i> <sub>6</sub> -DMSO) | S28 |

SpinWorks 4: DJB-710-proton-DMSO-overnight-reflux

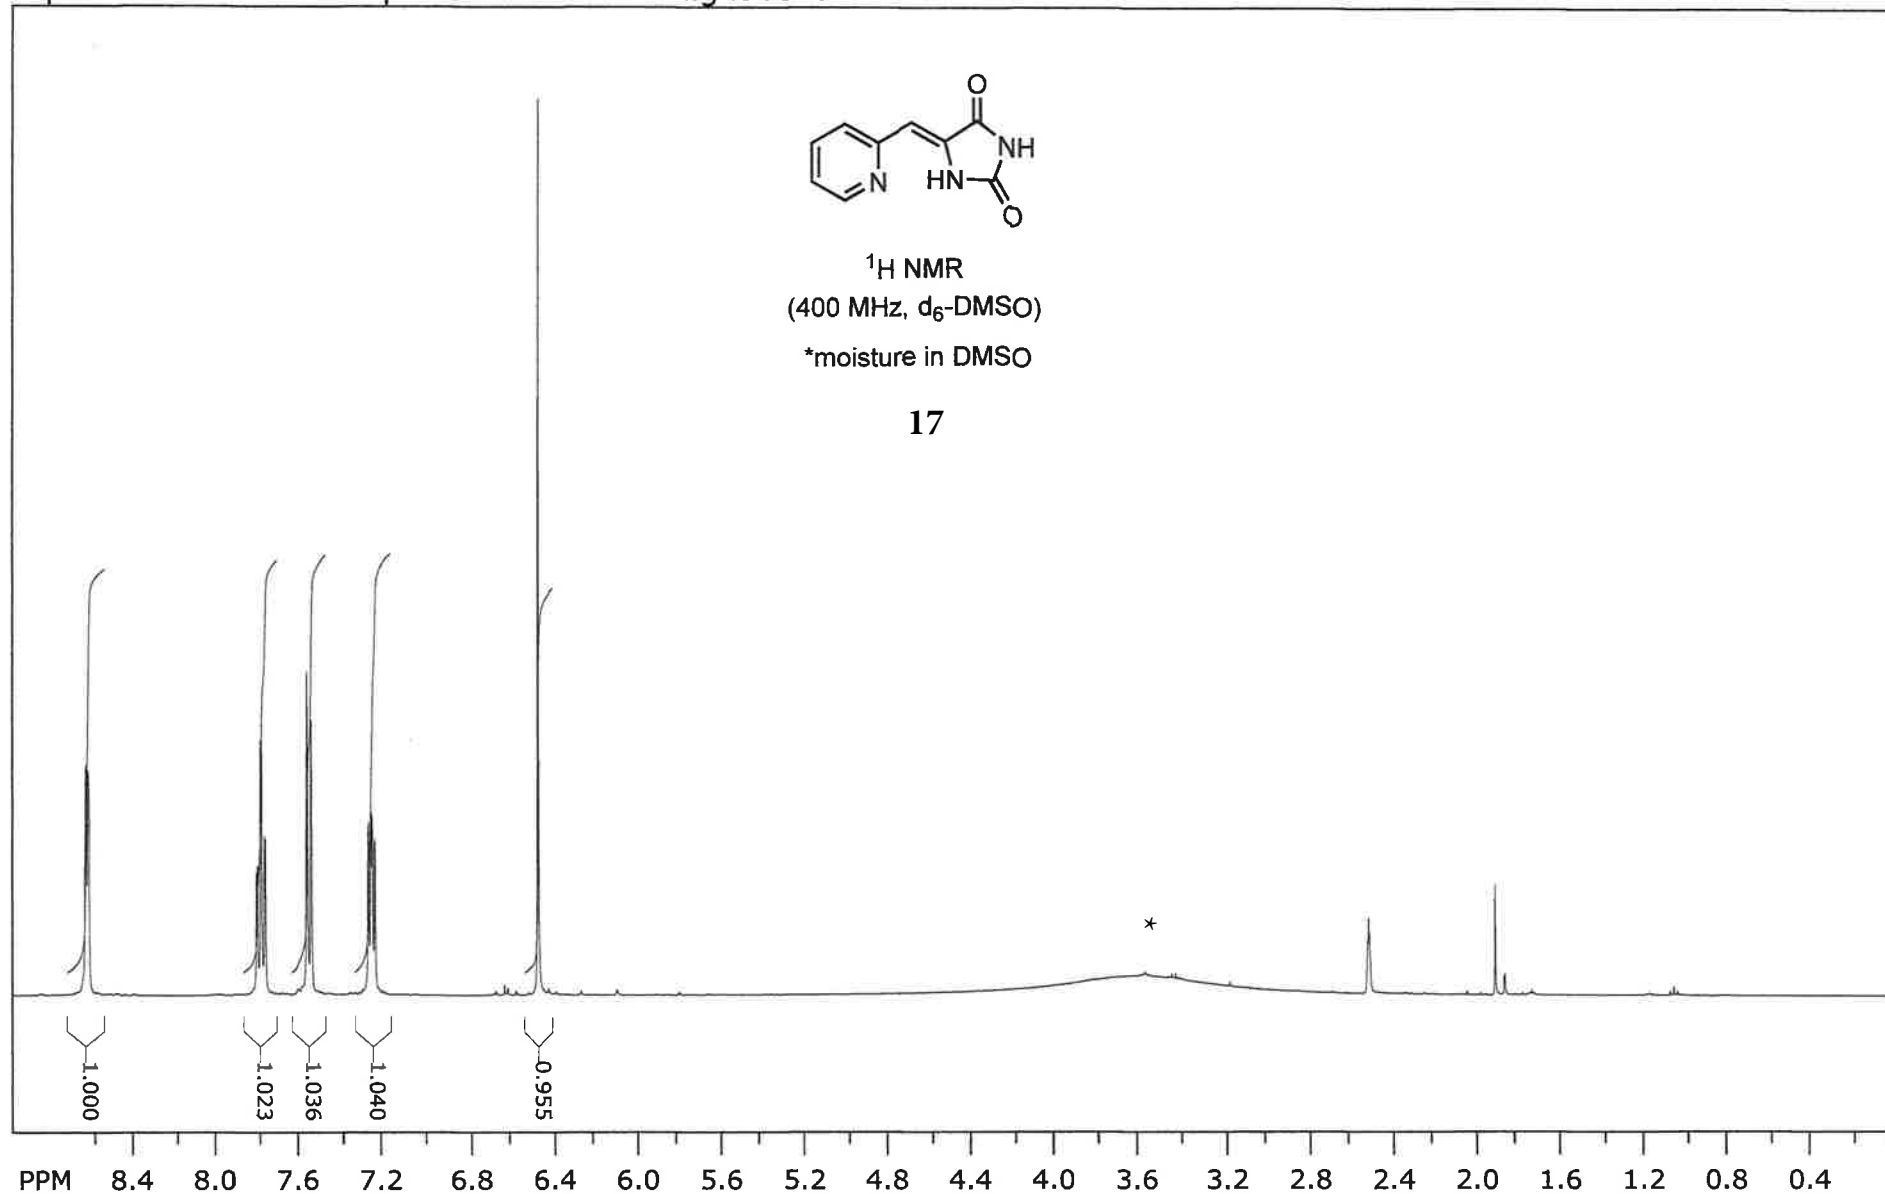

file: ...oton-DMSO-reflux-overnight.fid\fid block# 1 expt: "s2pul"  
transmitter freq.: 399.732139 MHz  
time domain size: 32768 points  
width: 6410.26 Hz = 16.0364 ppm = 0.195626 Hz/pt  
number of scans: 8

freq. of 0 ppm: 399.729732 MHz  
processed size: 32768 complex points  
LB: 0.500 GF: 0.0000  
Hz/cm: 143.875 ppm/cm: 0.35993

# SpinWorks 4: 13C OBSERVE

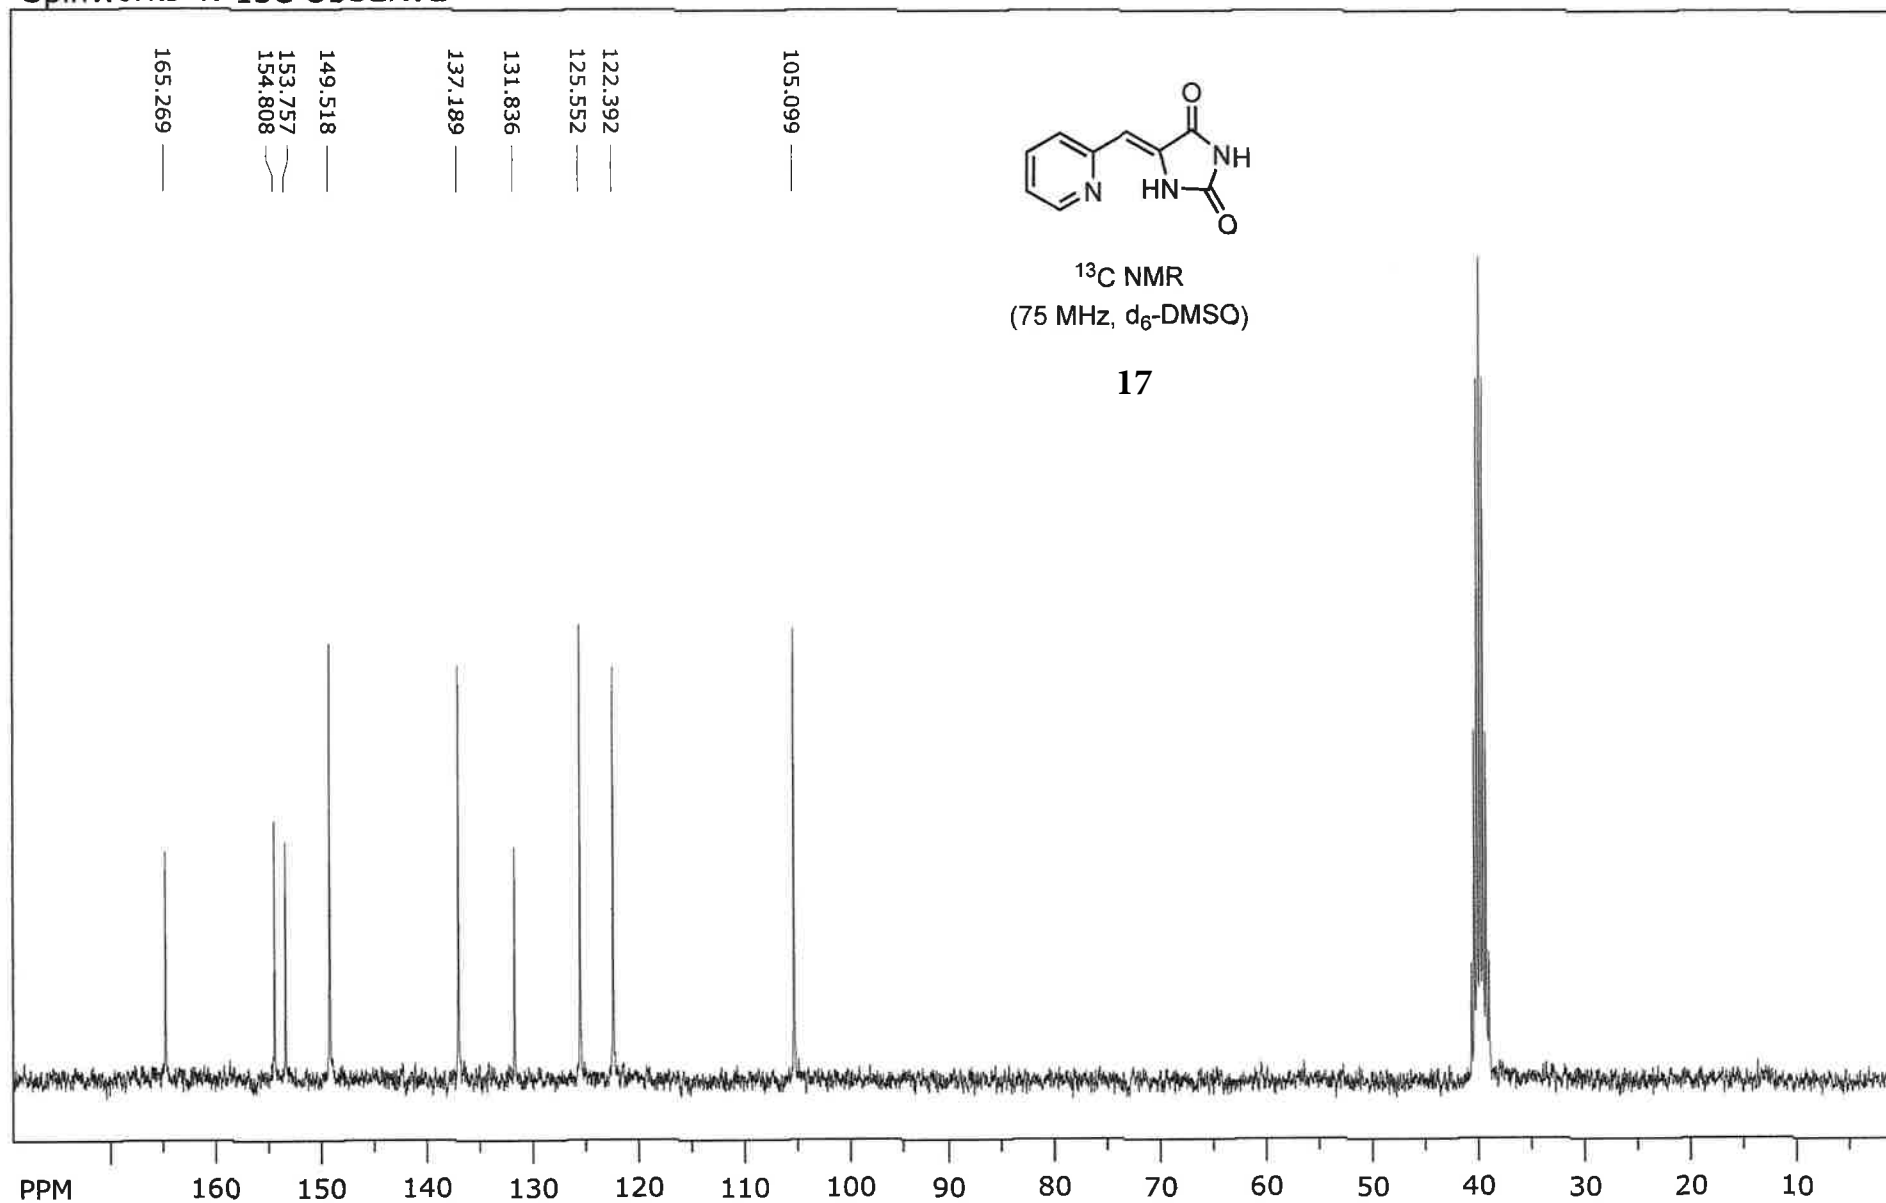

file: ...ldsonw\Desktop\DJB-234-13C.fid\fid block# 1 expt: "s2pul"  
transmitter freq.: 75.476694 MHz  
time domain size: 68492 points  
width: 18867.92 Hz = 249.9835 ppm = 0.275476 Hz/pt  
number of scans: 256

freq. of 0 ppm: 75.468435 MHz  
processed size: 131072 complex points  
LB: 2.500 GF: 0.0000  
Hz/cm: 543.396 ppm/cm: 7.19952

# SpinWorks 4: DJB-331-proton

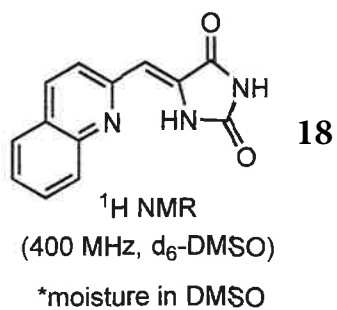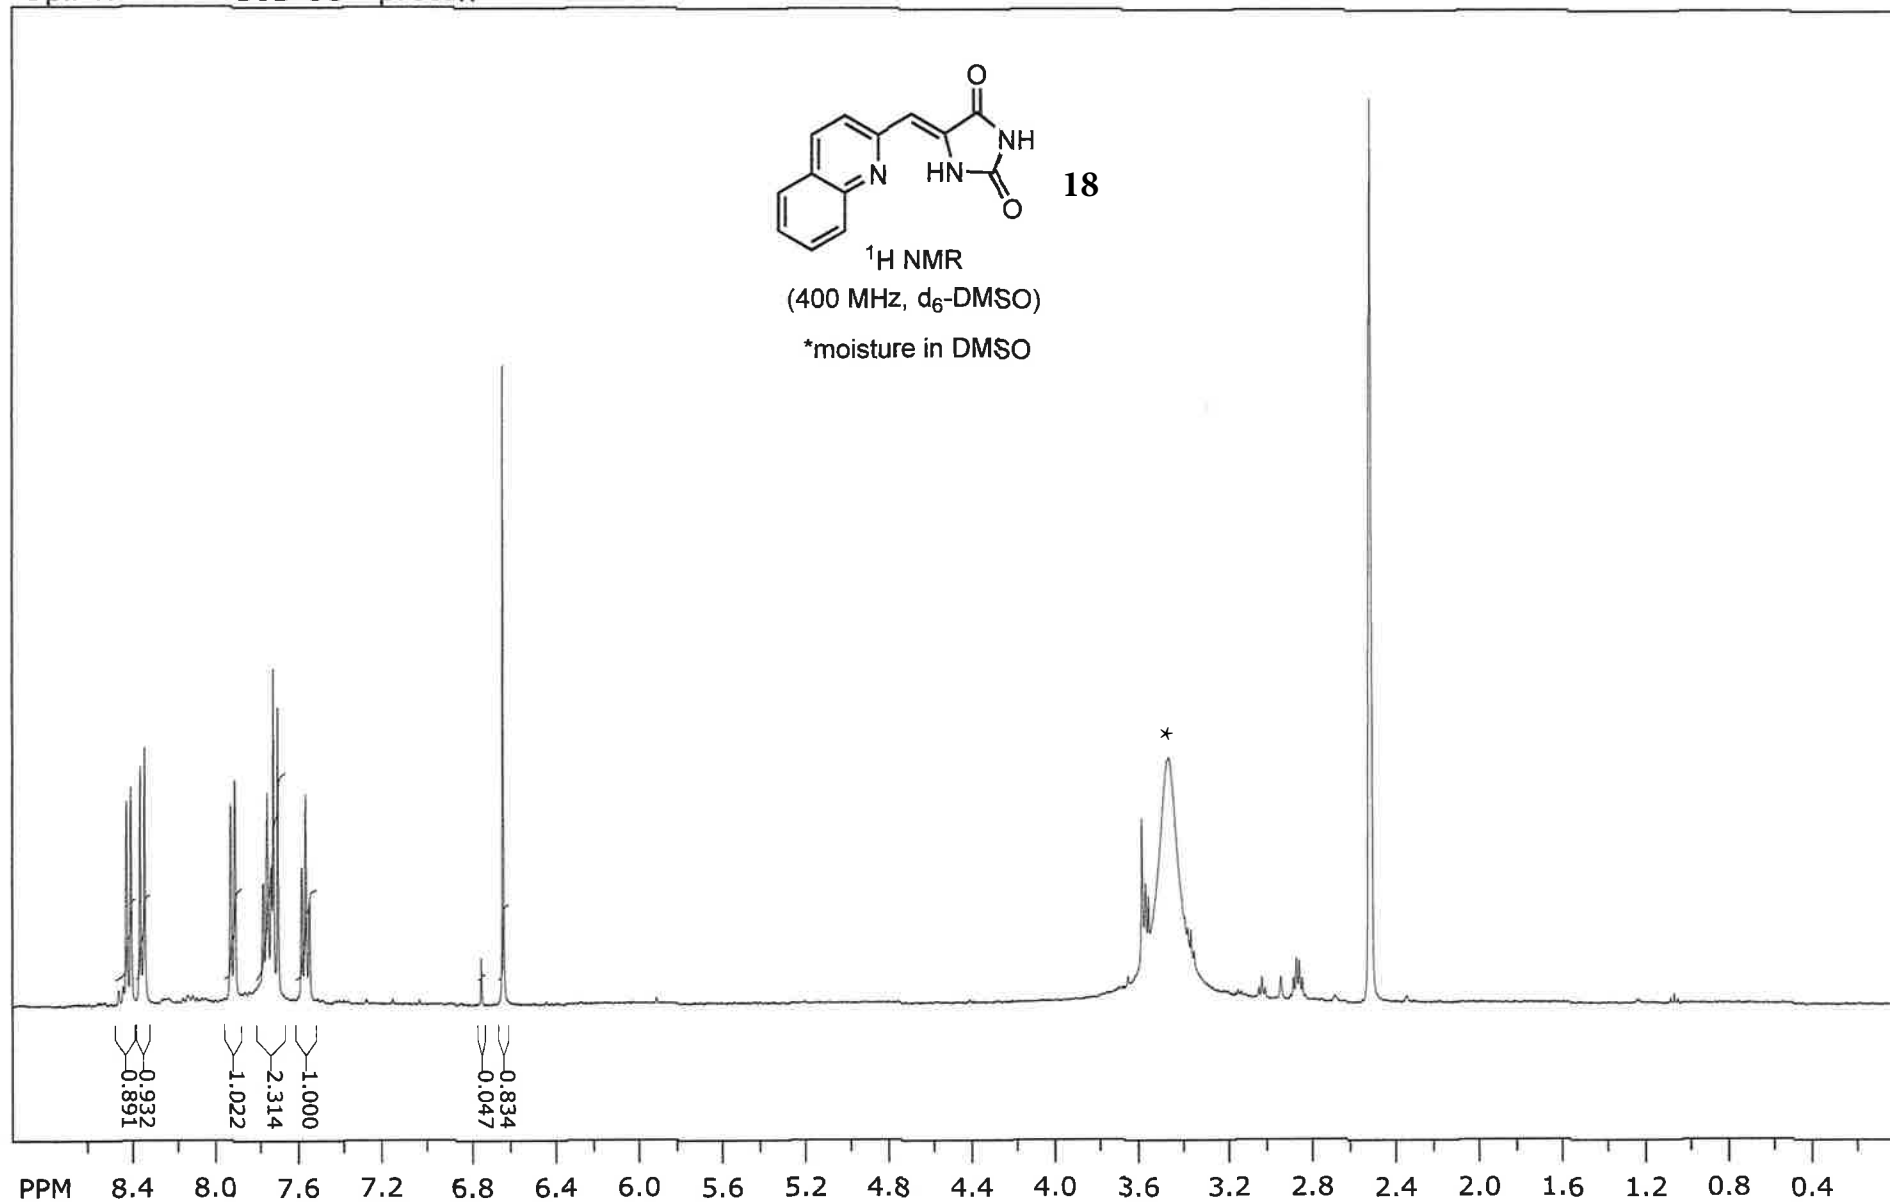

file: ...DJB spectra\DJB-334-proton.fid\fid block# 1 expt: "s2pul"  
 transmitter freq.: 399.736048 MHz  
 time domain size: 32768 points  
 width: 6410.26 Hz = 16.0362 ppm = 0.195626 Hz/pt  
 number of scans: 8

freq. of 0 ppm: 399.733634 MHz  
 processed size: 32768 complex points  
 LB: 0.500 GF: 0.0000  
 Hz/cm: 143.875 ppm/cm: 0.35992

SpinWorks 4:

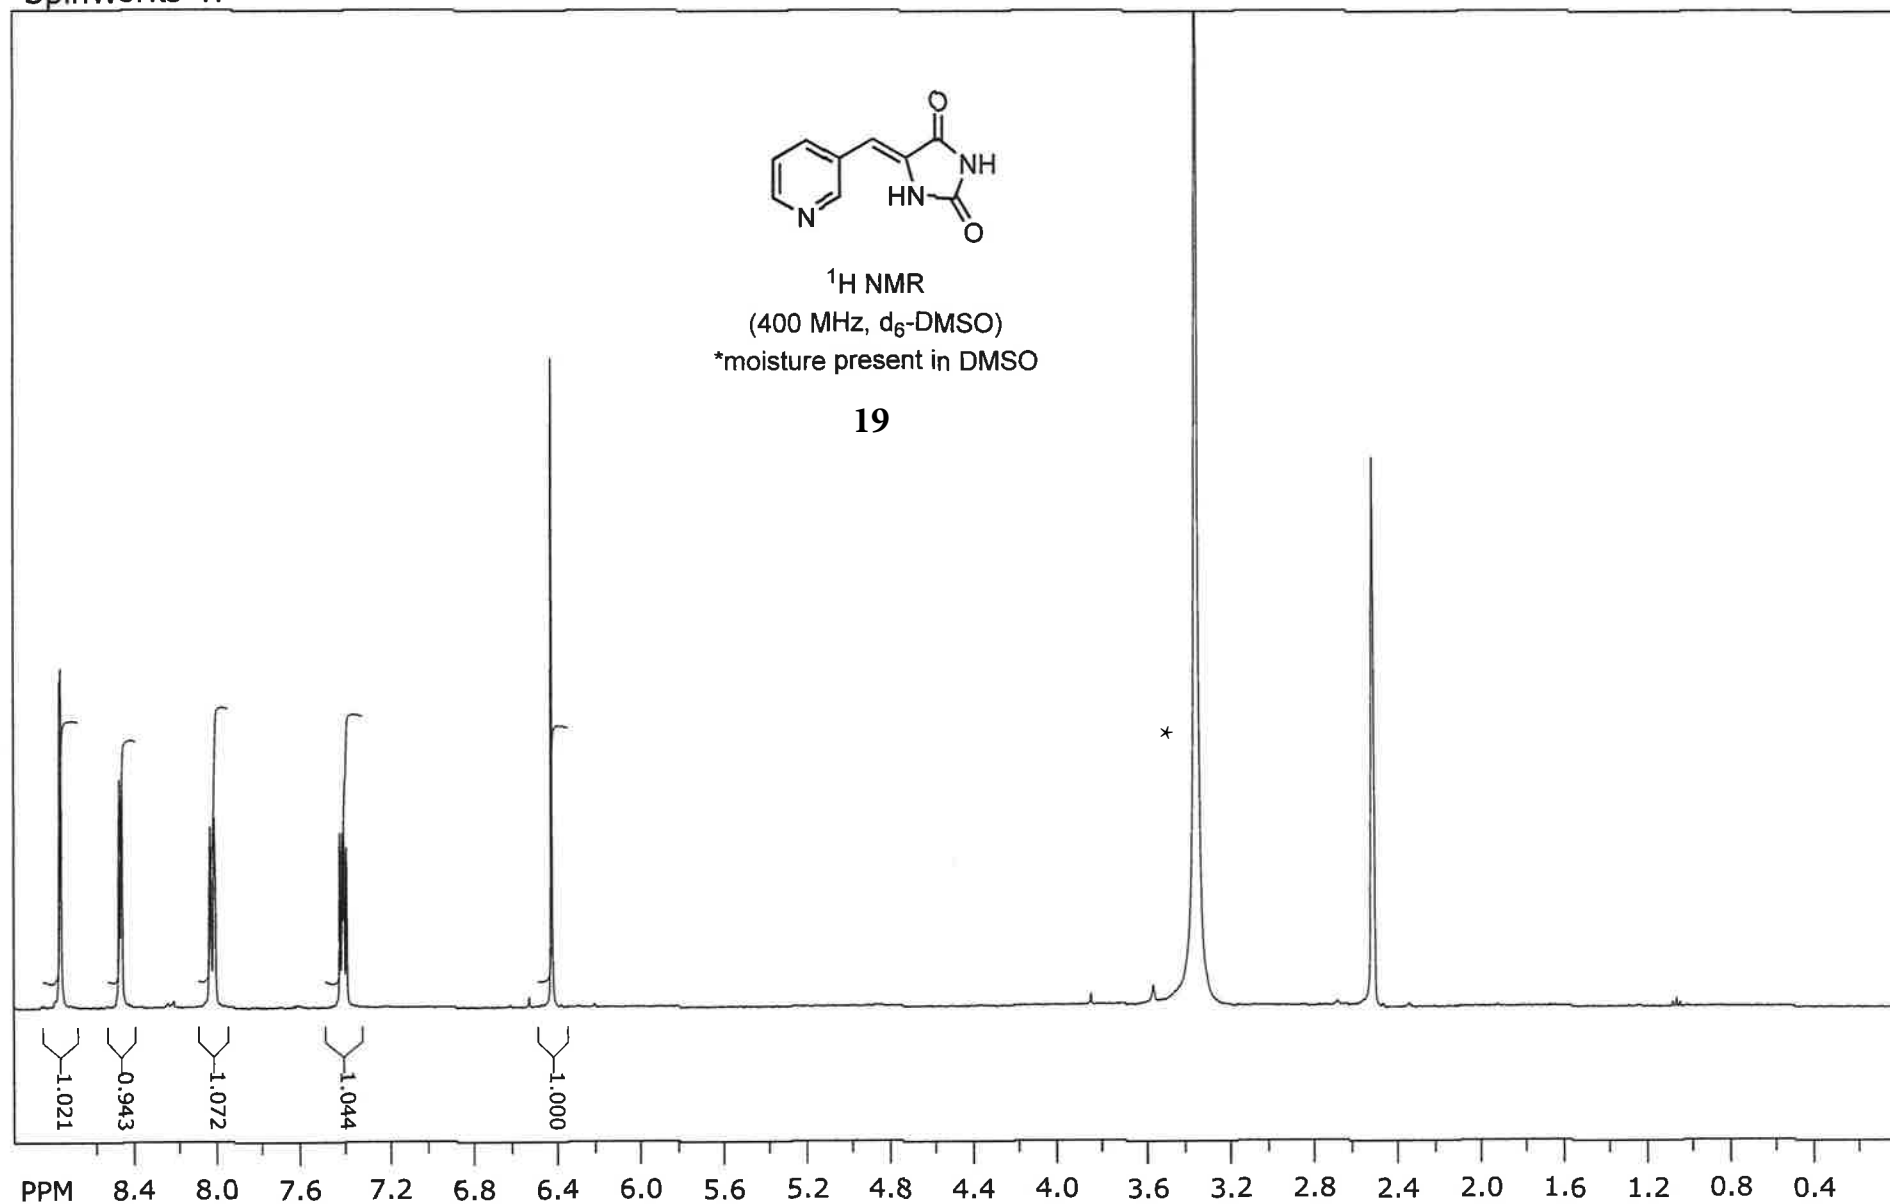

file: ...DJB spectra\DJB-235-proton.fid\fid block# 1 expt: "s2pul"  
 transmitter freq.: 399.738002 MHz  
 time domain size: 26264 points  
 width: 6410.26 Hz = 16.0361 ppm = 0.244070 Hz/pt  
 number of scans: 8

freq. of 0 ppm: 399.735598 MHz  
 processed size: 65536 complex points  
 LB: 0.500 GF: 0.0000  
 Hz/cm: 143.875 ppm/cm: 0.35992

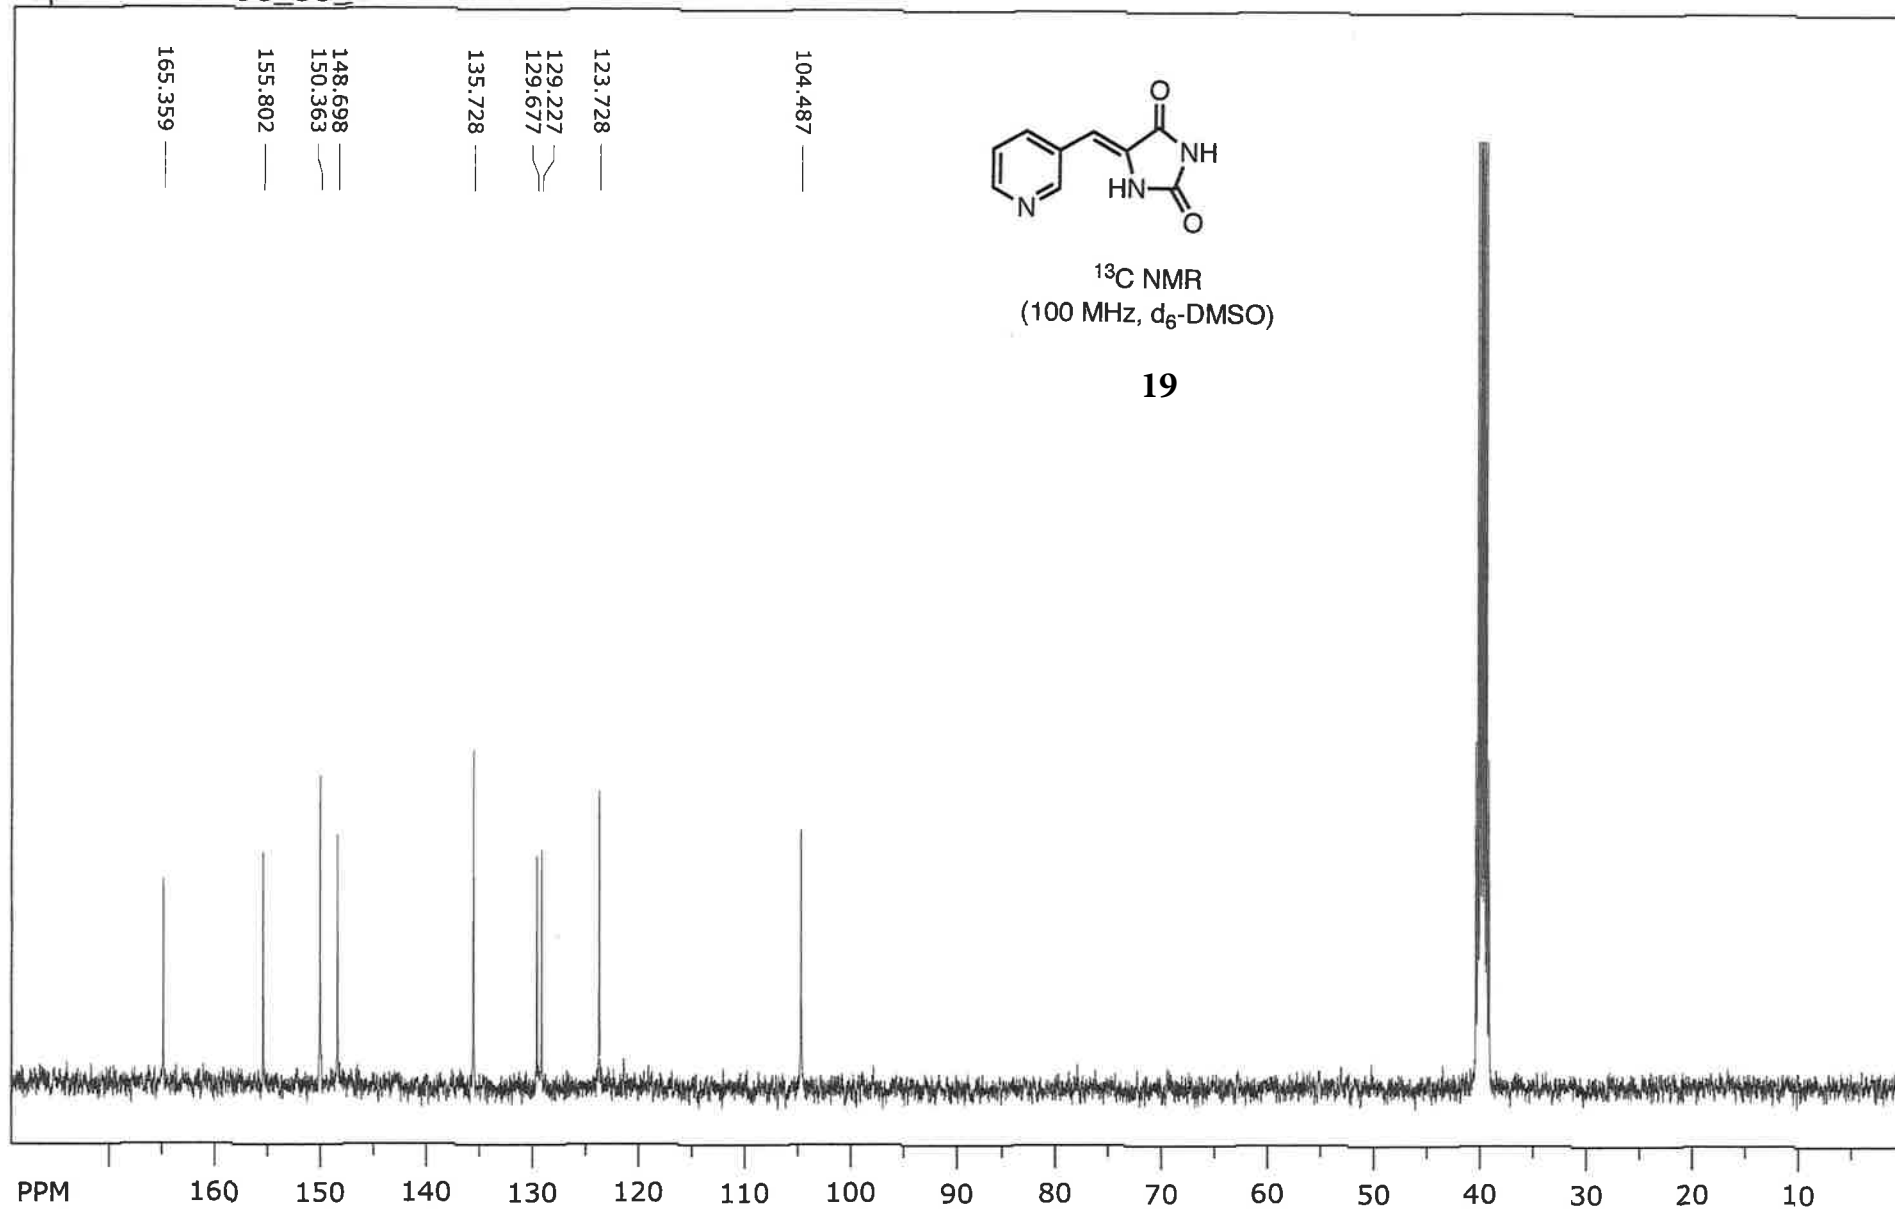

file: ...on\WD325\_13C\_DMSO\_20240116.fid\fid block# 1 expt: "s2pul"  
transmitter freq.: 100.523180 MHz  
time domain size: 65536 points  
width: 25000.00 Hz = 248.6989 ppm = 0.381470 Hz/pt  
number of scans: 2048

freq. of 0 ppm: 100.512160 MHz  
processed size: 65536 complex points  
LB: 2.500 GF: 0.0000  
Hz/cm: 723.333 ppm/cm: 7.19569

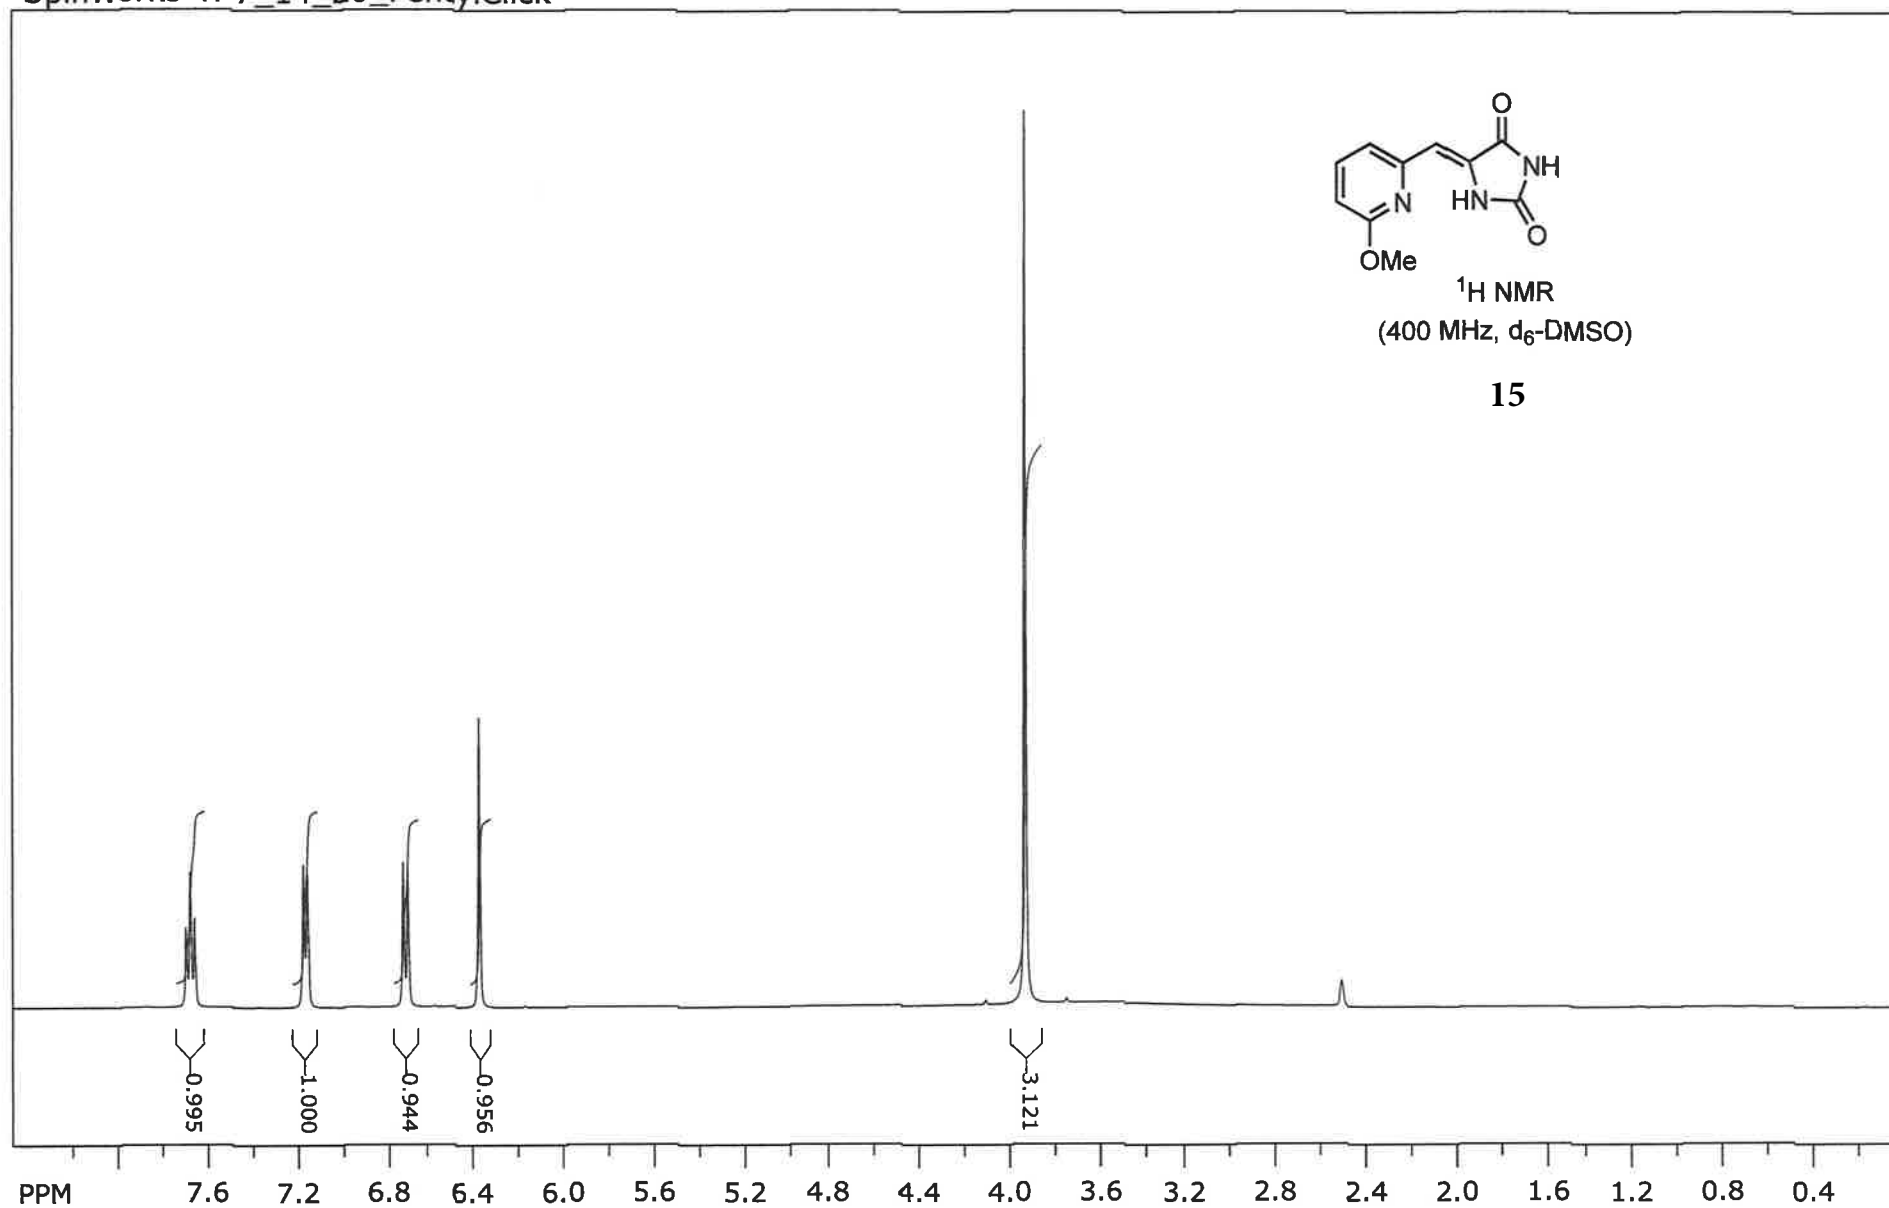

file: ...spectra\WD340-349\WD340-1H.fid\fid\_block# 1 expt: "s2pul"  
transmitter freq.: 399.732139 MHz  
time domain size: 32768 points  
width: 6410.26 Hz = 16.0364 ppm = 0.195626 Hz/pt  
number of scans: 8

freq. of 0 ppm: 399.729734 MHz  
processed size: 32768 complex points  
LB: 0.500 GF: 0.0000  
Hz/cm: 135.897 ppm/cm: 0.33997

SpinWorks 4: 7\_27\_20\_Ester\_carbon

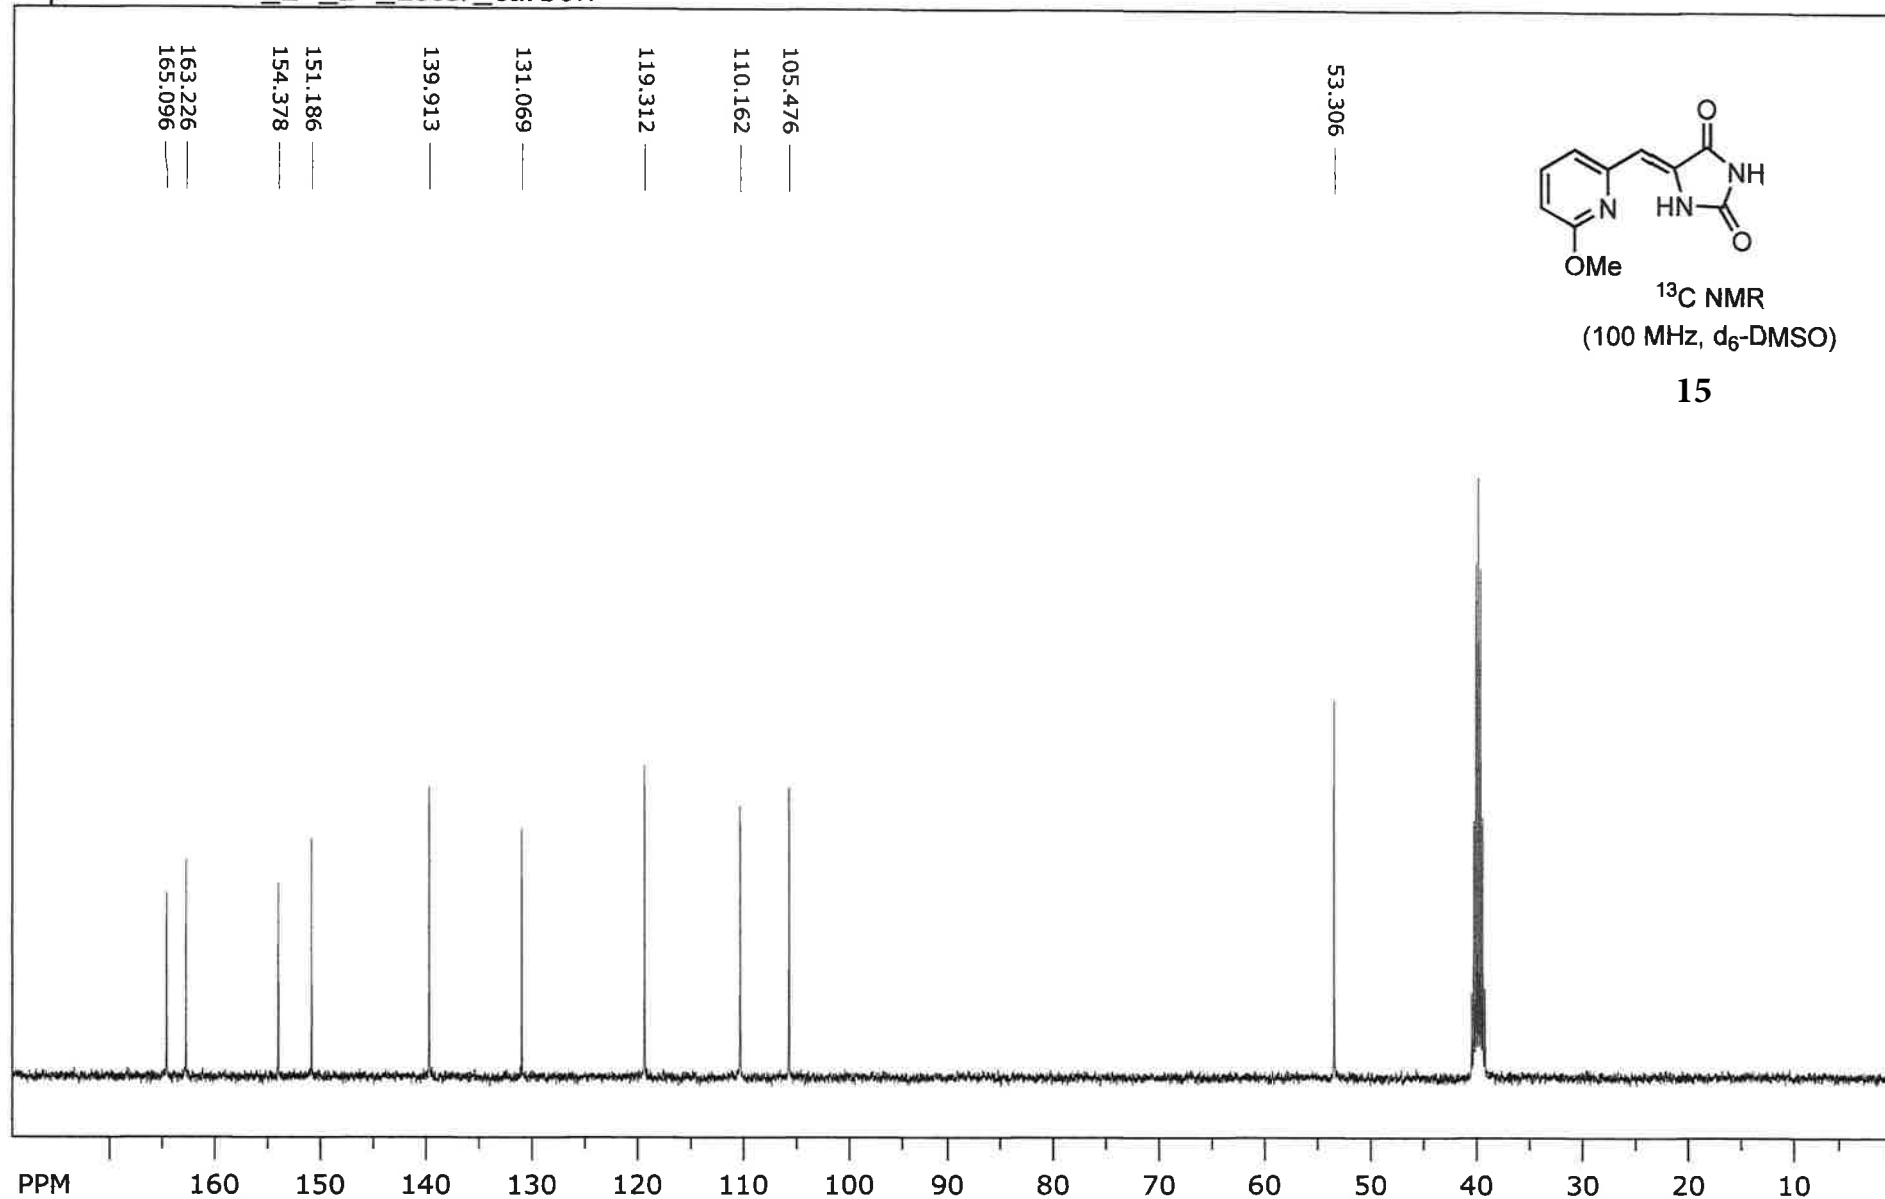

file: ...ectra\WD spectra\WD340-13C.fid\fid block# 1 expt: "s2pul"  
 transmitter freq.: 100.523180 MHz  
 time domain size: 65536 points  
 width: 25000.00 Hz = 248.6989 ppm = 0.381470 Hz/pt  
 number of scans: 256

freq. of 0 ppm: 100.512156 MHz  
 processed size: 65536 complex points  
 LB: 1.500 GF: 0.0000  
 Hz/cm: 723.889 ppm/cm: 7.20121

# SpinWorks 4: STANDARD 1H OBSERVE

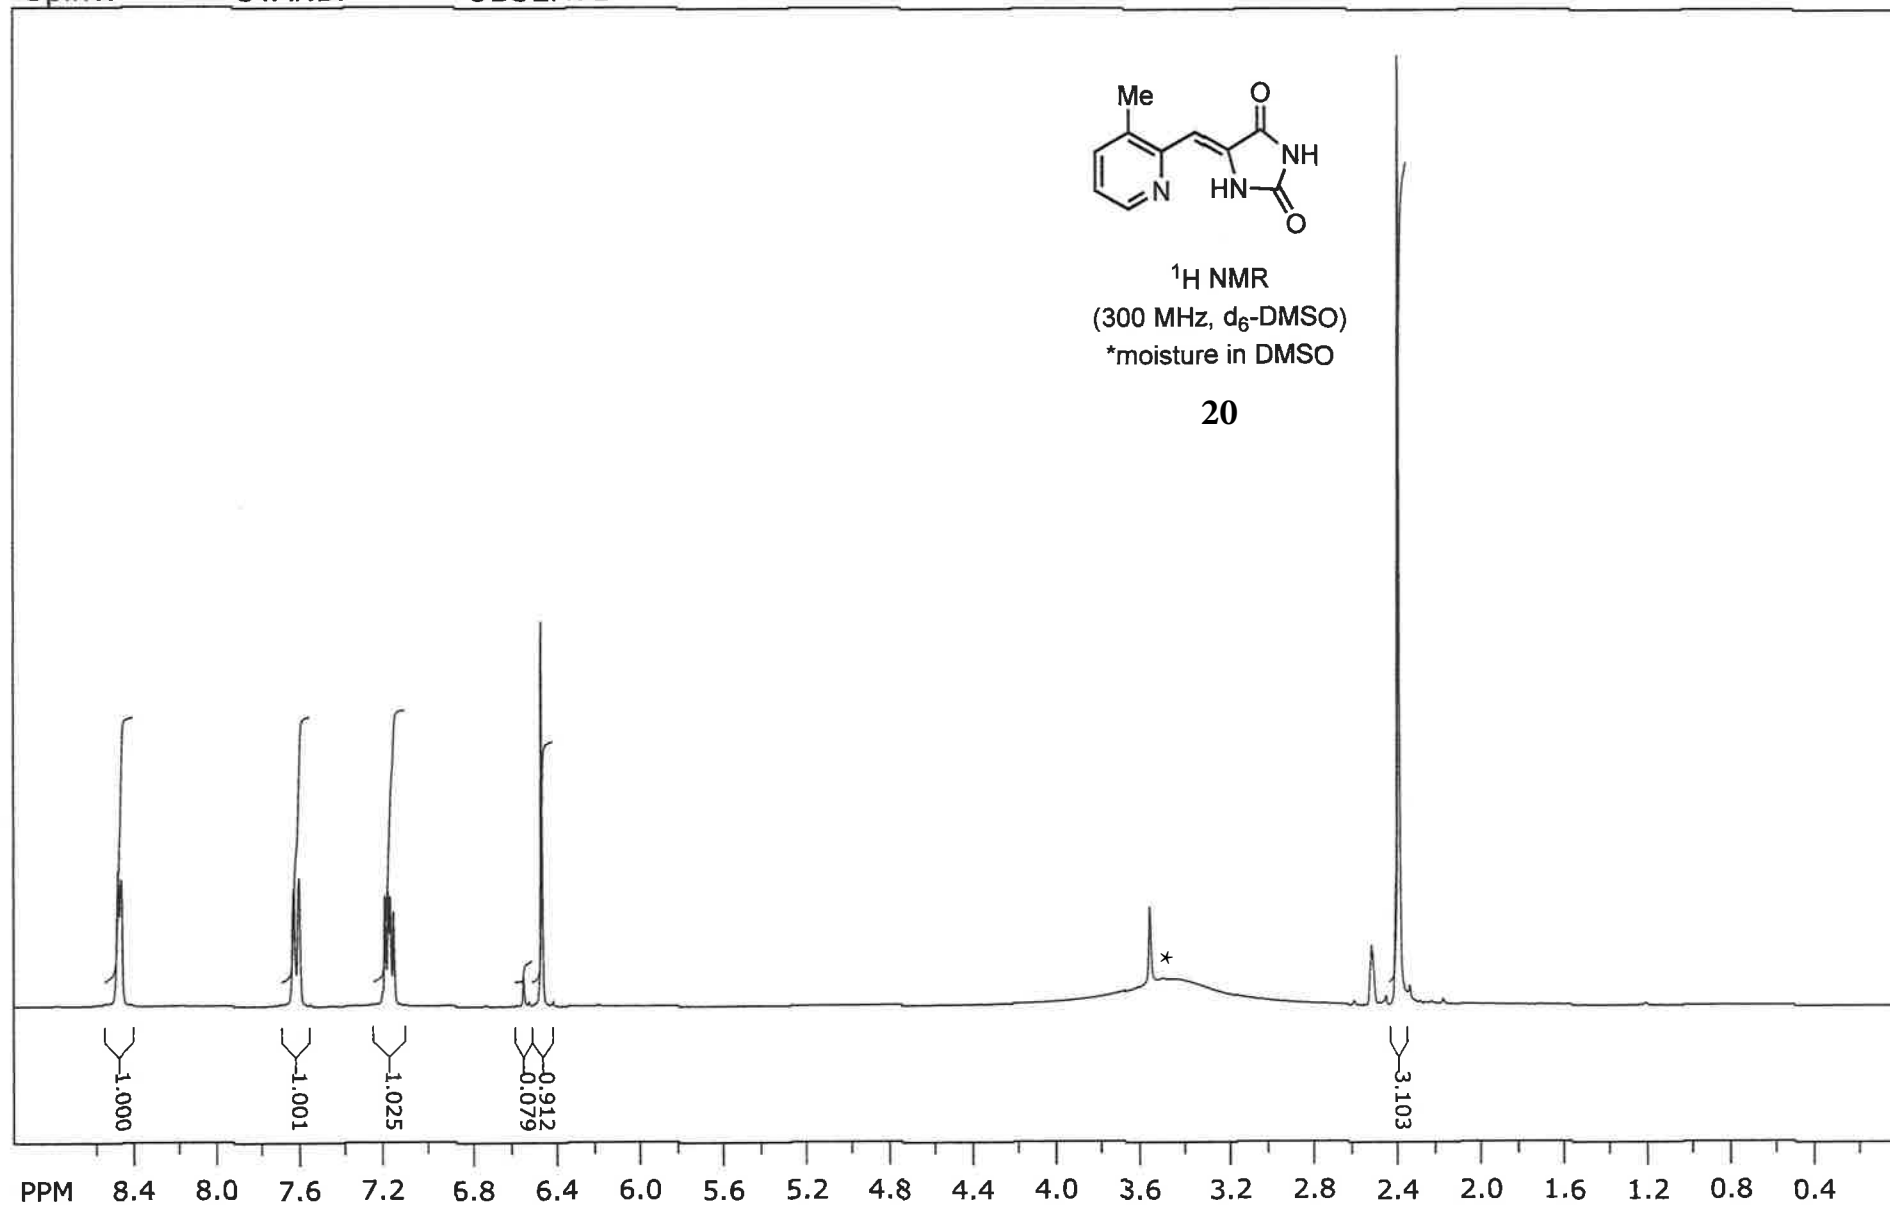

file: ...pectra\WD320-329\WD-328\_1H.fid\fid block# 1 expt: "s2pul"  
transmitter freq.: 300.134434 MHz  
time domain size: 19192 points  
width: 4803.07 Hz = 16.0031 ppm = 0.250264 Hz/pt  
number of scans: 8

freq. of 0 ppm: 300.132628 MHz  
processed size: 32768 complex points  
LB: 0.500 GF: 0.0000  
Hz/cm: 108.016 ppm/cm: 0.35989

# SpinWorks 4: 13C OBSERVE

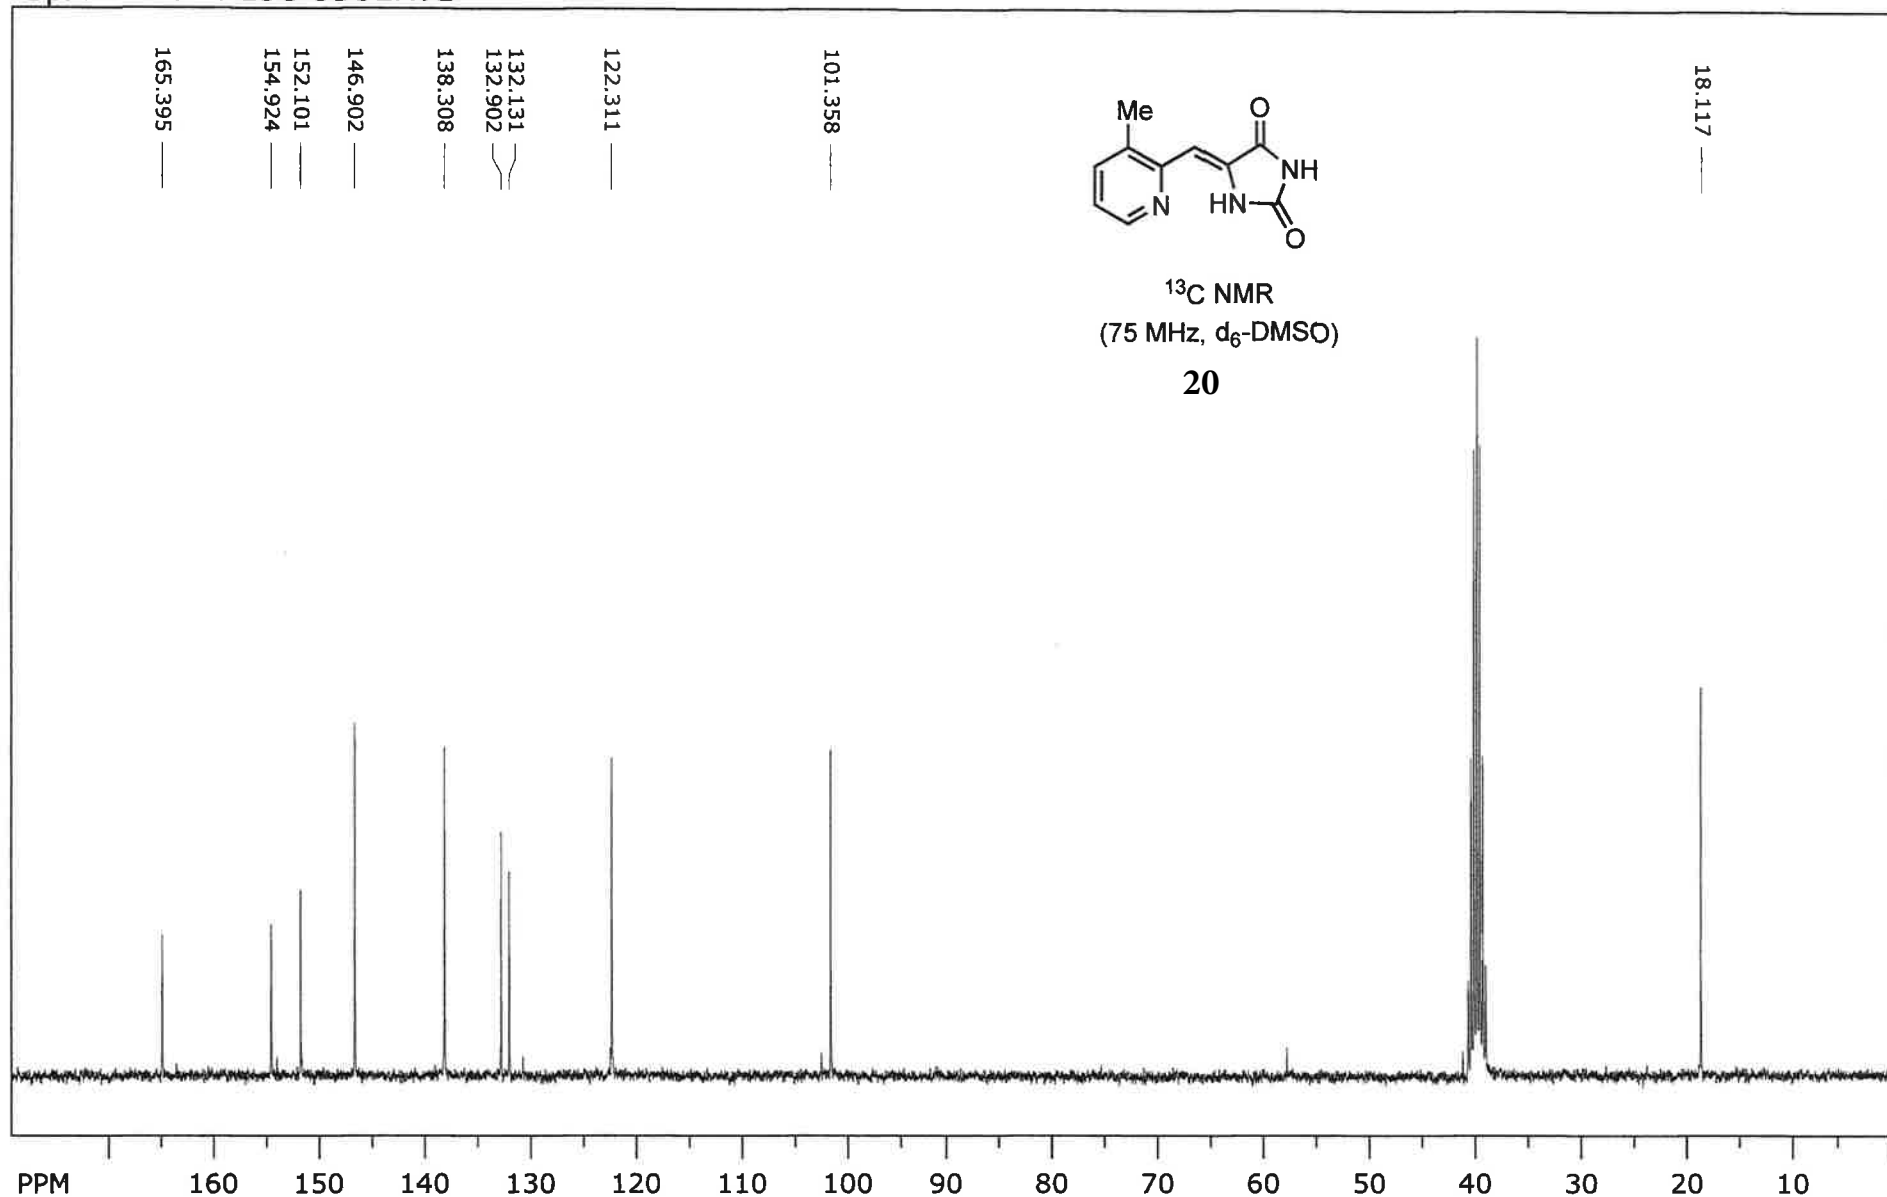

file: ...ctra\WD spectra\WD-328\_13C.fid\fid block# 1 expt: "s2pul"  
 transmitter freq.: 75.476694 MHz  
 time domain size: 68492 points  
 width: 18867.92 Hz = 249.9835 ppm = 0.275476 Hz/pt  
 number of scans: 384

freq. of 0 ppm: 75.468436 MHz  
 processed size: 131072 complex points  
 LB: 1.500 GF: 0.0000  
 Hz/cm: 543.396 ppm/cm: 7.19952

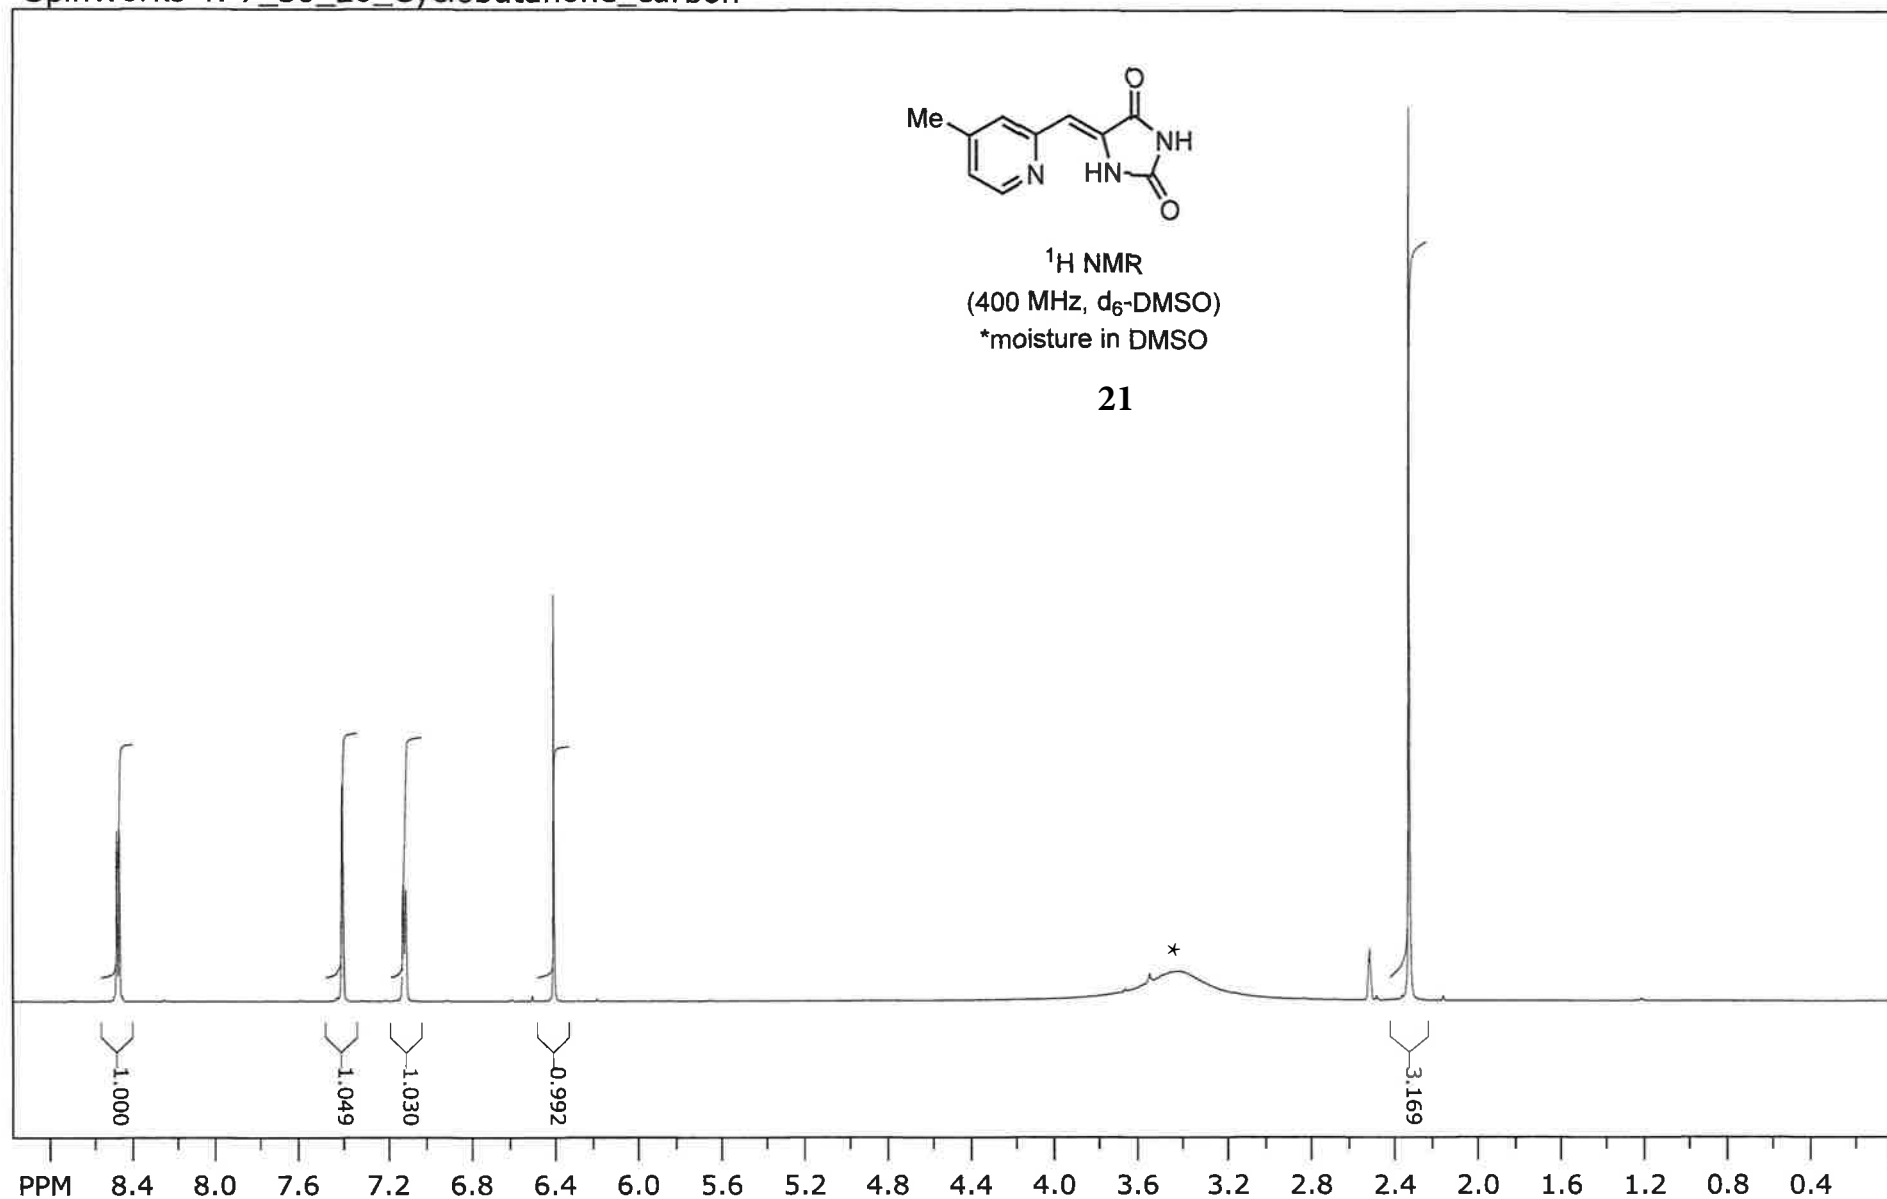

file: ...pectra\WD spectra\WD342\_1H.fid\fid block# 1 expt: "s2pul"  
 transmitter freq.: 399.732139 MHz  
 time domain size: 32768 points  
 width: 6410.26 Hz = 16.0364 ppm = 0.195626 Hz/pt  
 number of scans: 8

freq. of 0 ppm: 399.729733 MHz  
 processed size: 32768 complex points  
 LB: 0.051 GF: 0.0000  
 Hz/cm: 144.017 ppm/cm: 0.36028

SpinWorks 4: STANDARD 1H OBSERVE - profile

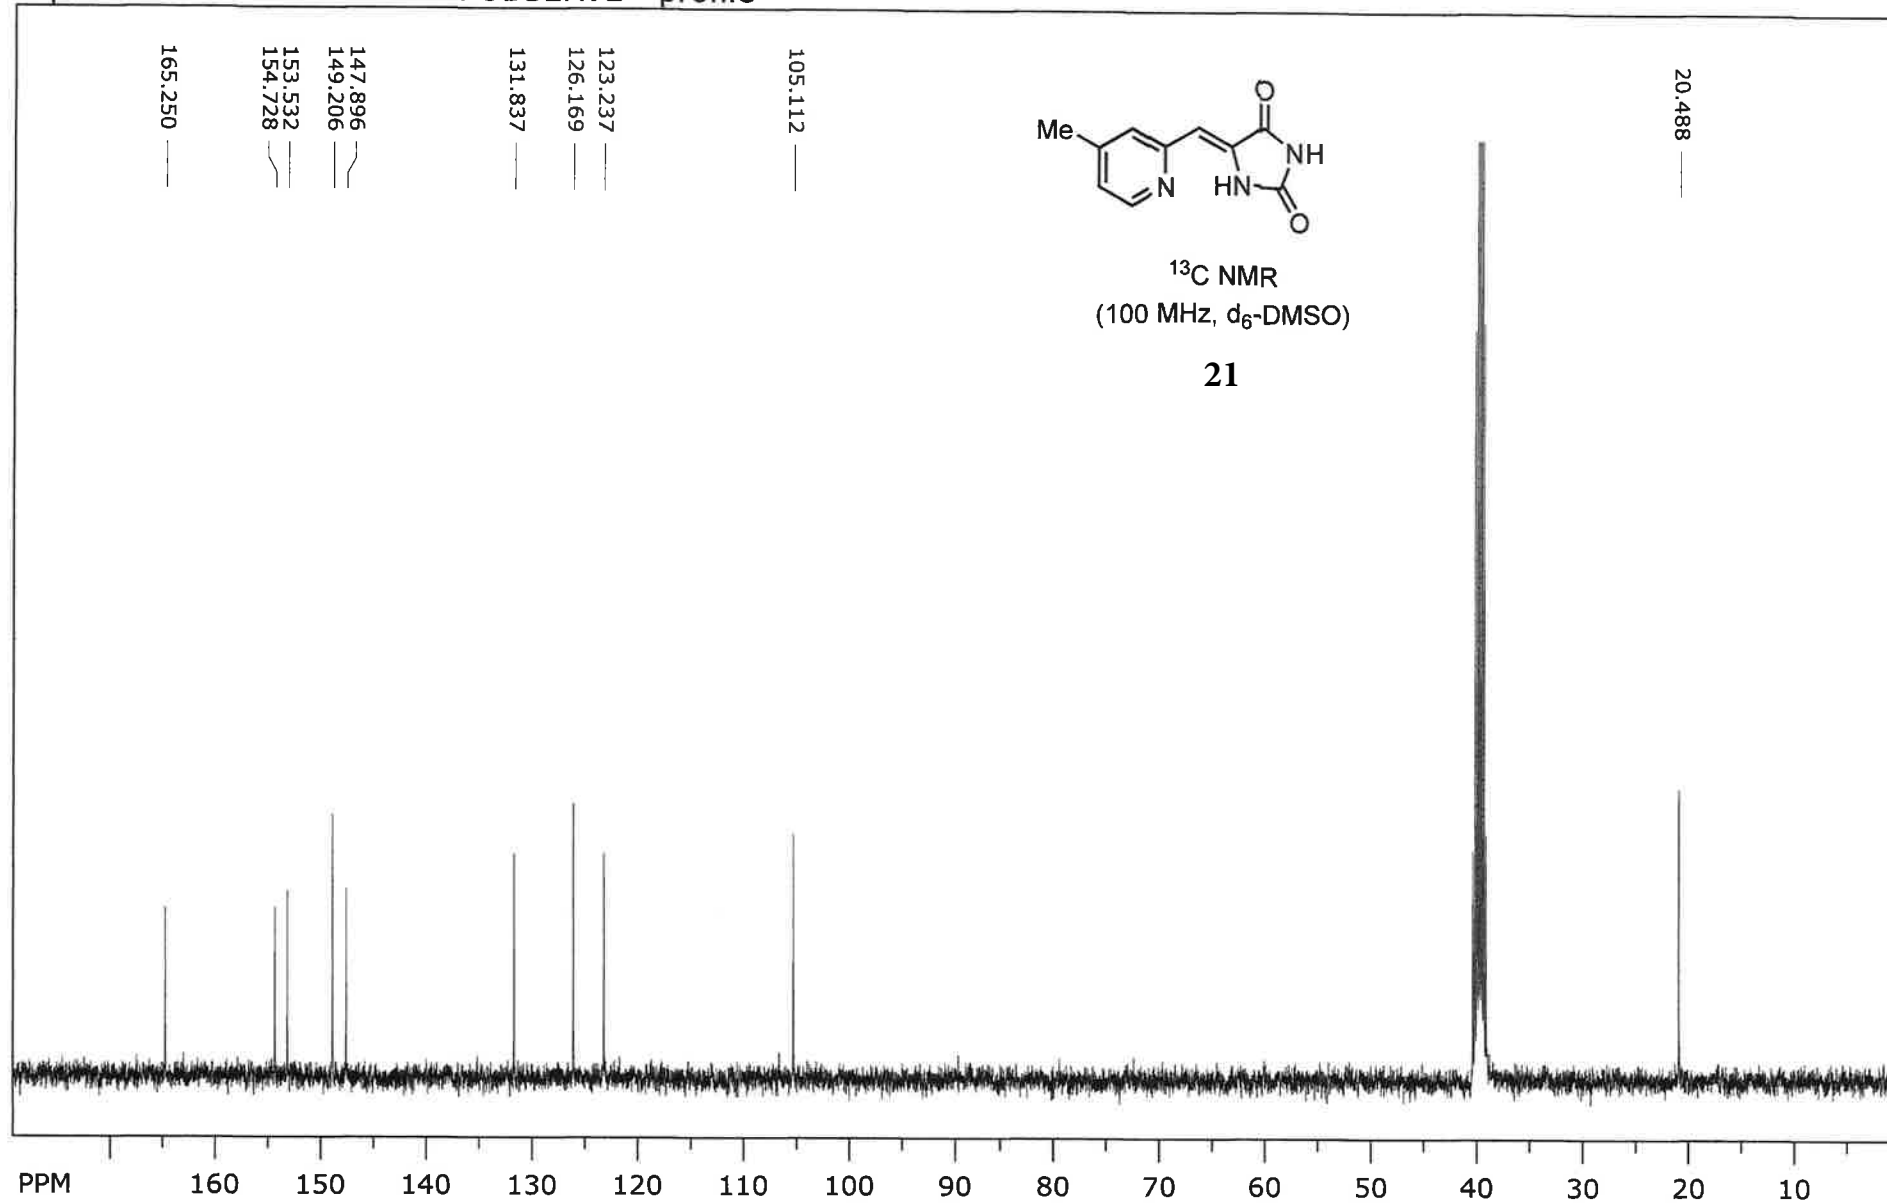

file: ...ectra\WD spectra\WD342\_13C.fid\fid block# 1 expt: "s2pul"  
 transmitter freq.: 100.523180 MHz  
 time domain size: 65536 points  
 width: 25000.00 Hz = 248.6989 ppm = 0.381470 Hz/pt  
 number of scans: 512

freq. of 0 ppm: 100.512160 MHz  
 processed size: 65536 complex points  
 LB: 1.500 GF: 0.0000  
 Hz/cm: 723.333 ppm/cm: 7.19569

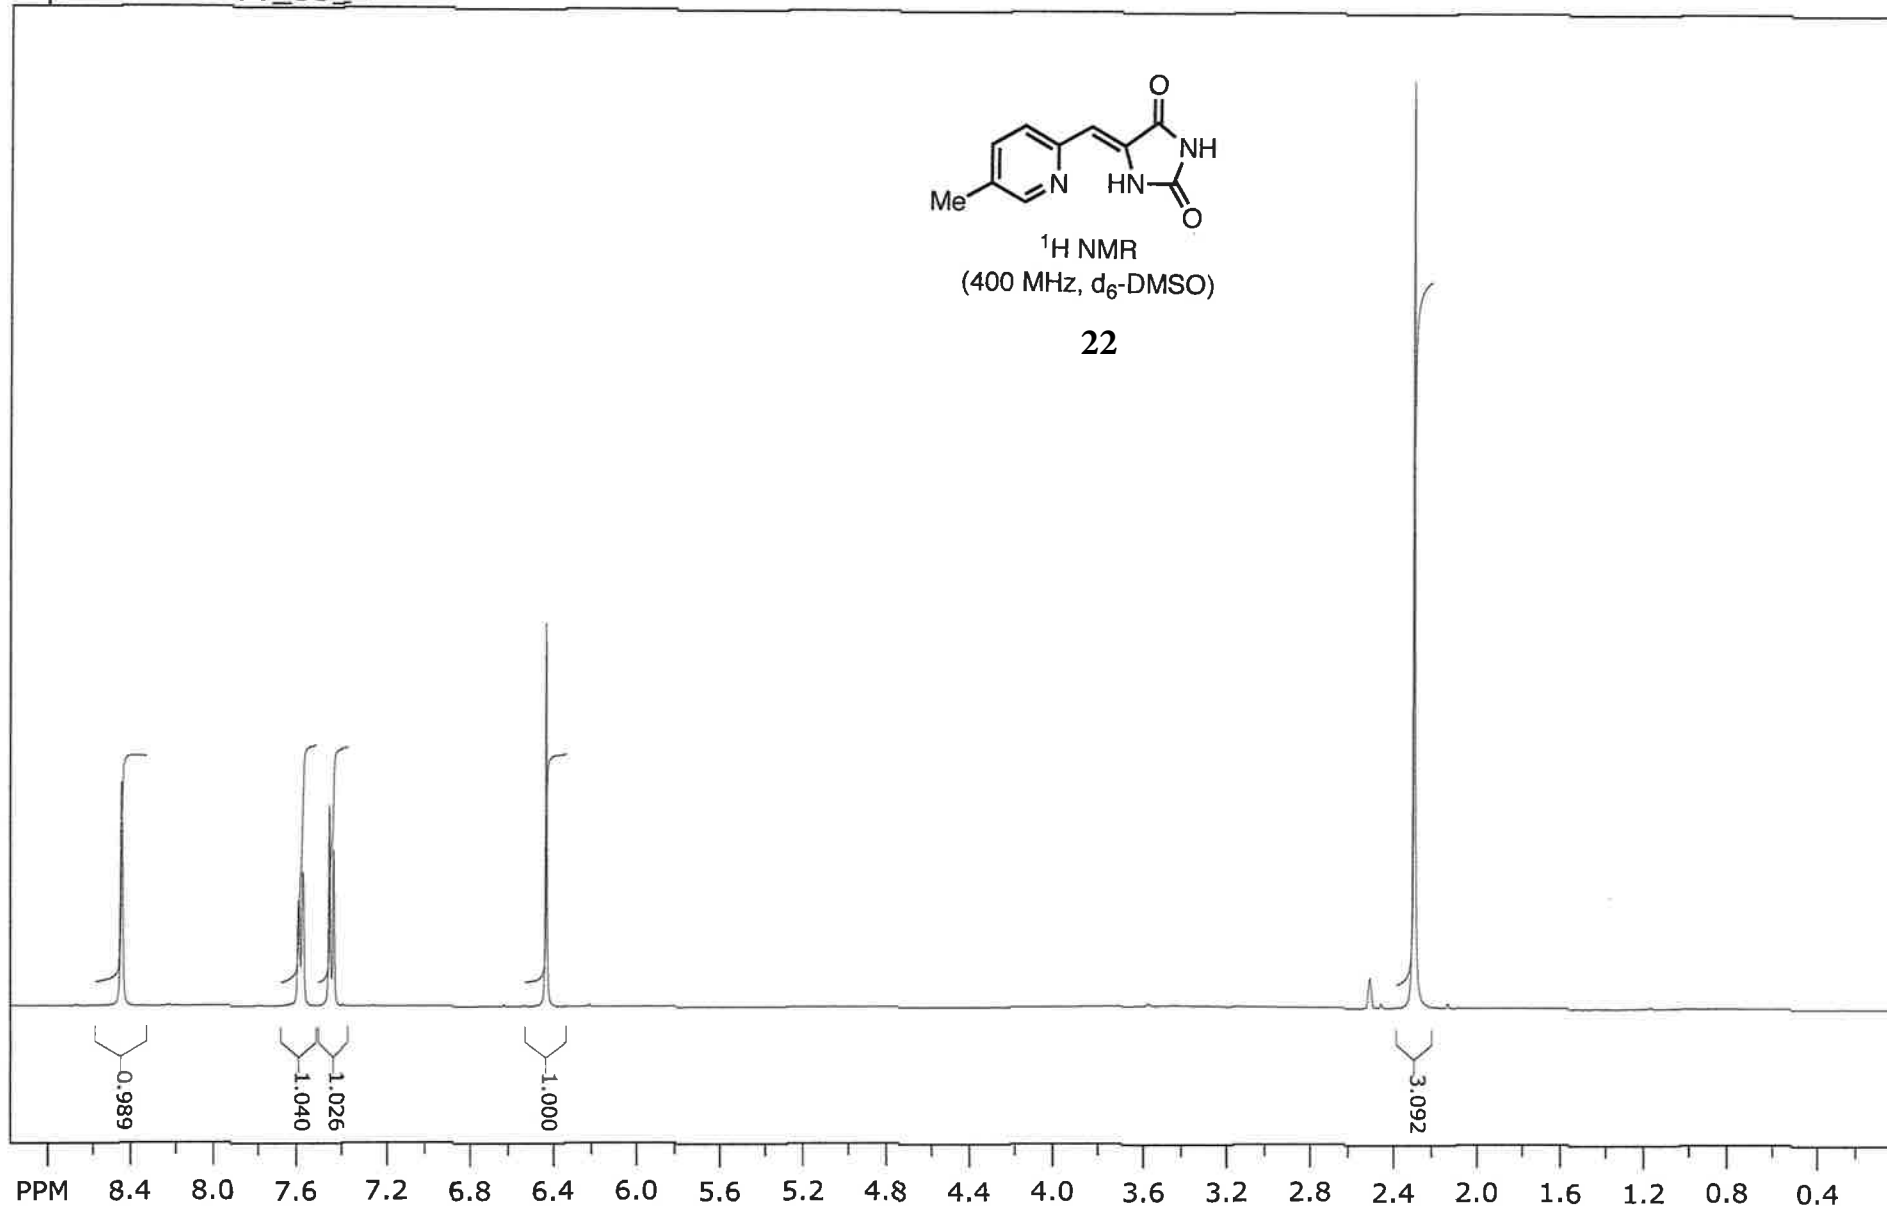

file: ...son\WD348\_1H\_DMSO\_20240118.fid\fid block# 1 expt: "s2pul"  
transmitter freq.: 399.732139 MHz  
time domain size: 32768 points  
width: 6410.26 Hz = 16.0364 ppm = 0.195626 Hz/pt  
number of scans: 16

freq. of 0 ppm: 399.729733 MHz  
processed size: 32768 complex points  
LB: 0.500 GF: 0.0000  
Hz/cm: 143.875 ppm/cm: 0.35993

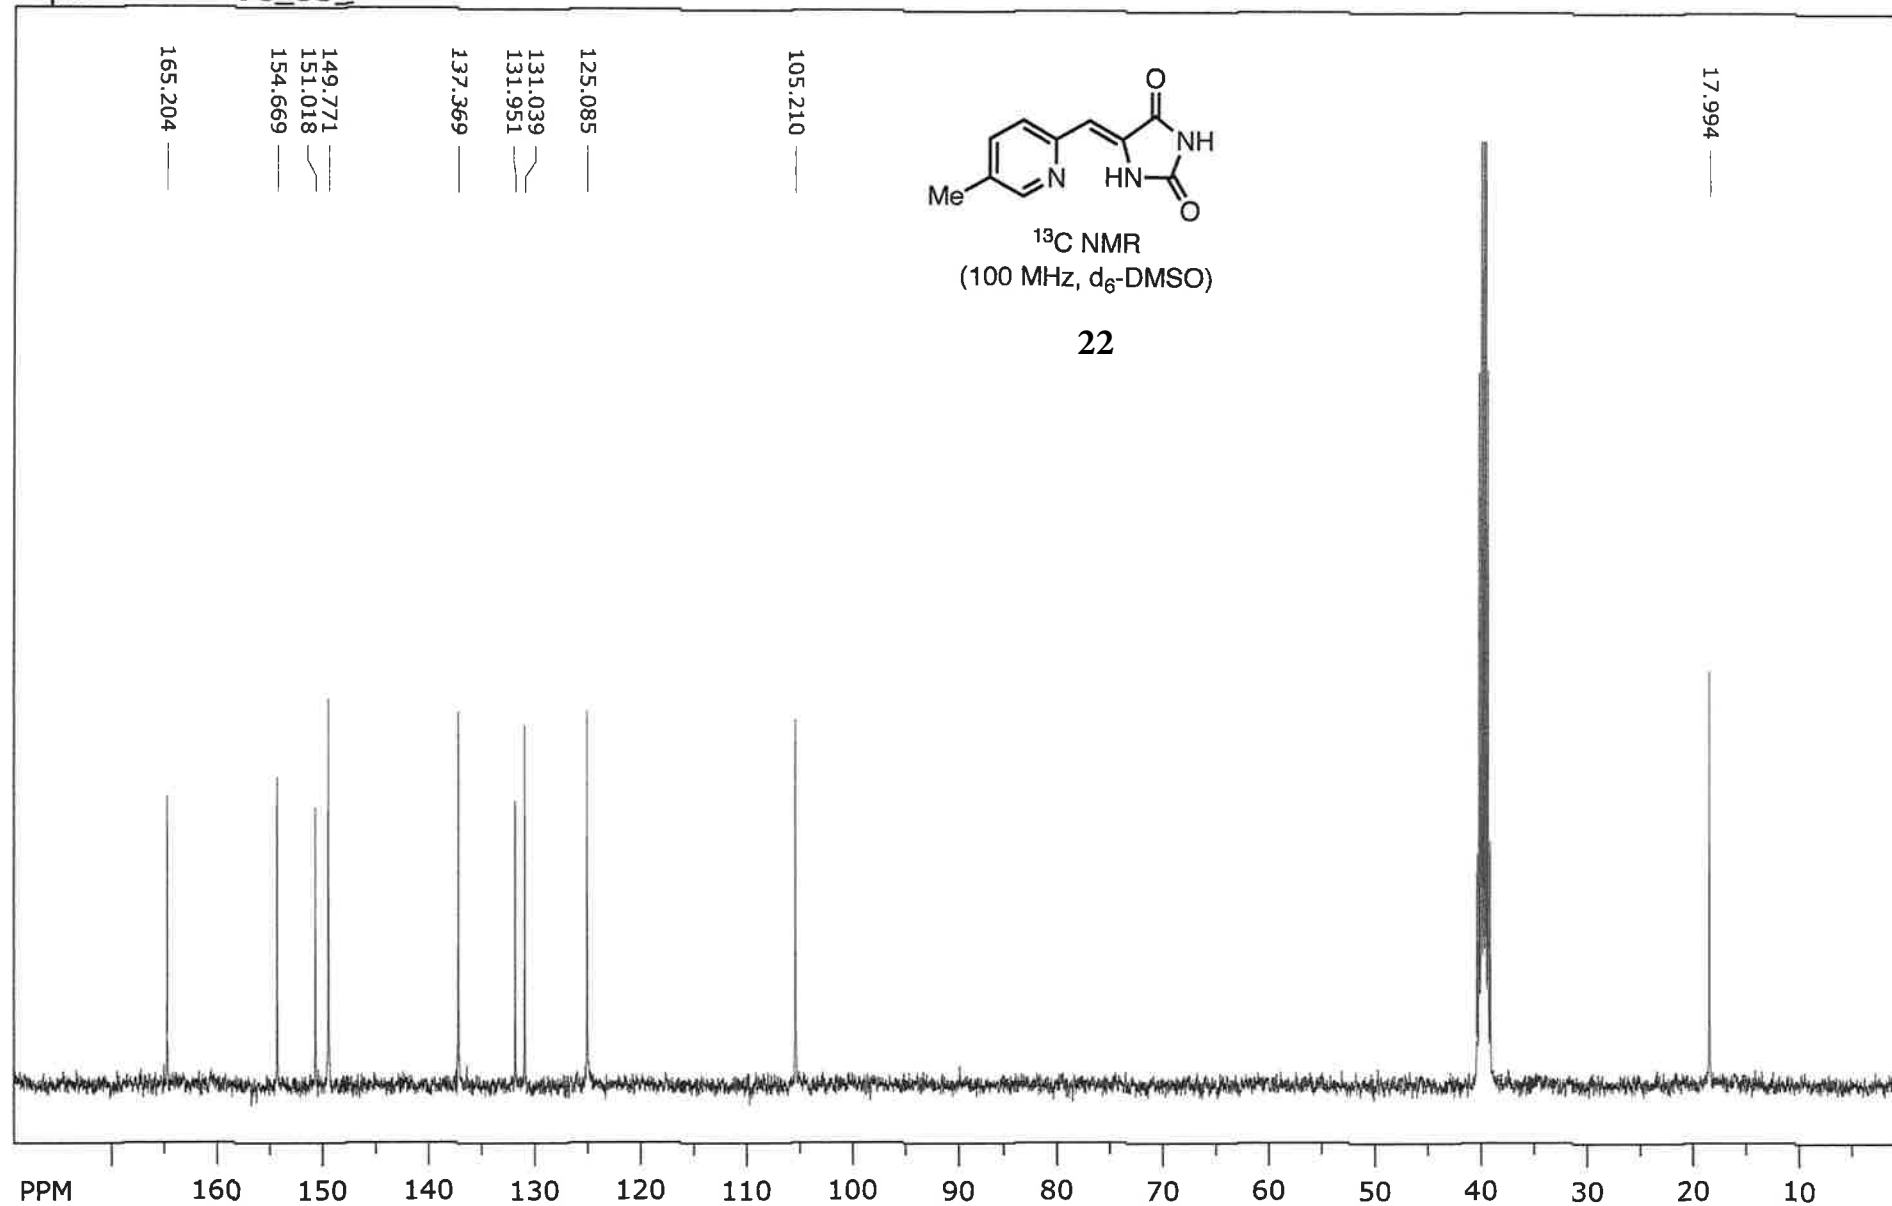

file: ...on\WD348\_13C\_DMSO\_20240118.fid\fid block# 1 expt: "s2pul"  
transmitter freq.: 100.523180 MHz  
time domain size: 65536 points  
width: 25000.00 Hz = 248.6989 ppm = 0.381470 Hz/pt  
number of scans: 2048

freq. of 0 ppm: 100.512160 MHz  
processed size: 65536 complex points  
LB: 2.500 GF: 0.0000  
Hz/cm: 723.333 ppm/cm: 7.19569

# SpinWorks 4: STANDARD 1H OBSERVE

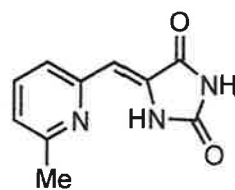

<sup>1</sup>H NMR  
(300 MHz, d<sub>6</sub>-DMSO)

**23**

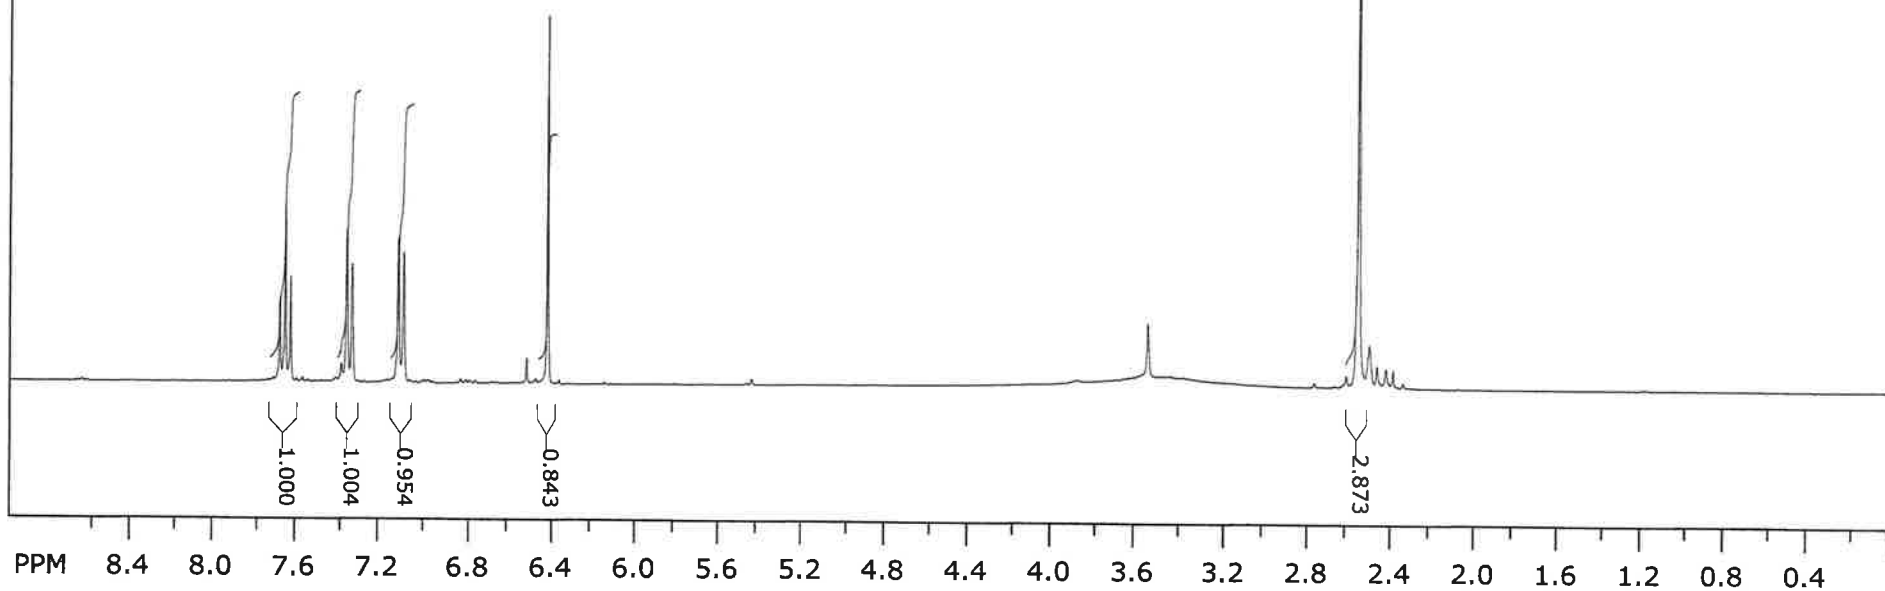

file: ...pectra\WD spectra\WD329\_1H.fid\fid block# 1 expt: "s2pul"  
 transmitter freq.: 300.134434 MHz  
 time domain size: 19192 points  
 width: 4803.07 Hz = 16.0031 ppm = 0.250264 Hz/pt  
 number of scans: 8

freq. of 0 ppm: 300.132634 MHz  
 processed size: 32768 complex points  
 LB: 0.500 GF: 0.0000  
 Hz/cm: 108.016 ppm/cm: 0.35989

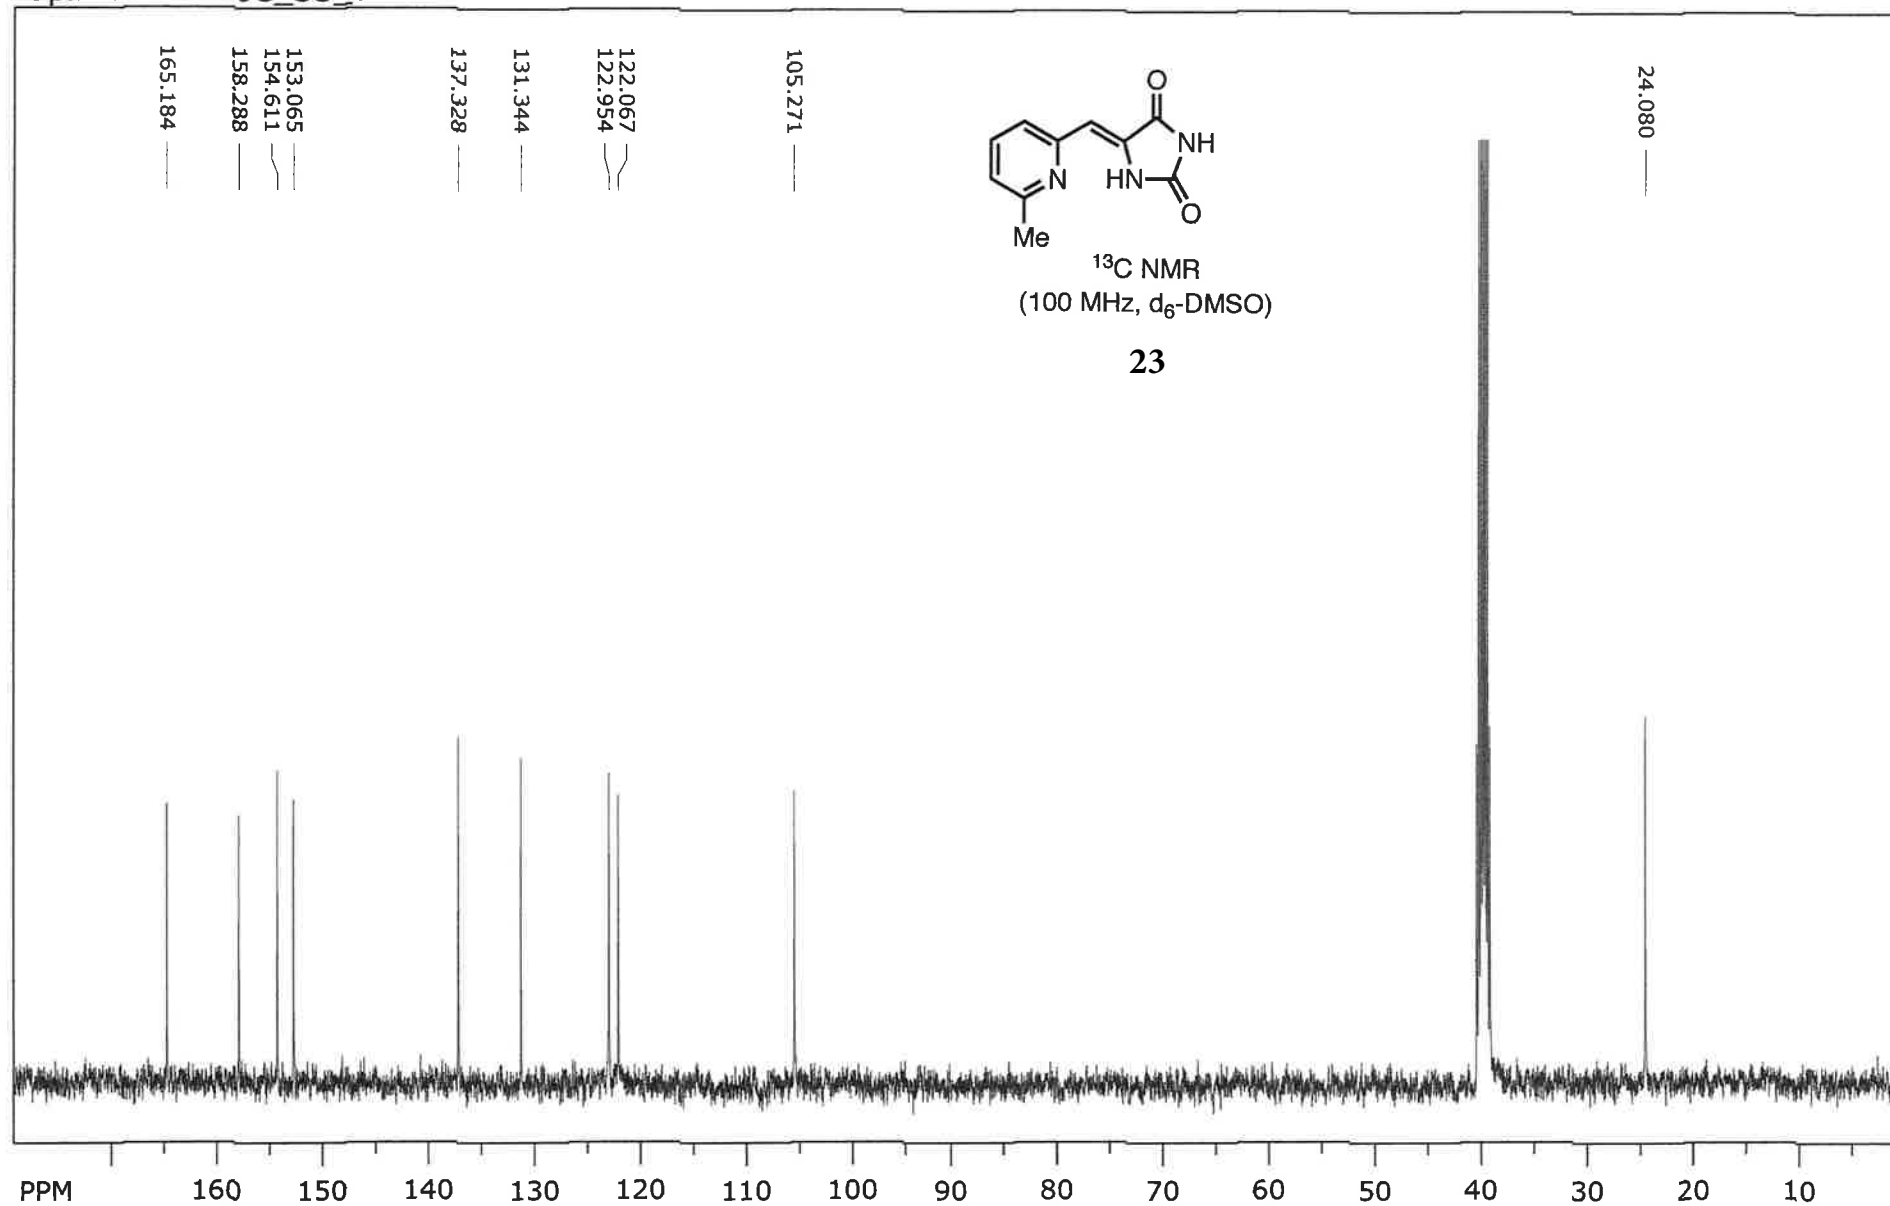

file: ...on\WD329\_13C\_DMSO\_20240116.fid\fid block# 1 expt: "s2pul"  
transmitter freq.: 100.523180 MHz  
time domain size: 65536 points  
width: 25000.00 Hz = 248.6989 ppm = 0.381470 Hz/pt  
number of scans: 1088

freq. of 0 ppm: 100.512161 MHz  
processed size: 65536 complex points  
LB: 2.500 GF: 0.0000  
Hz/cm: 723.333 ppm/cm: 7.19569

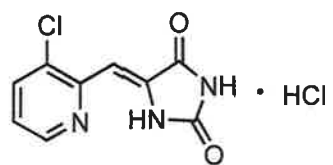

<sup>1</sup>H NMR  
(400 MHz, d<sub>6</sub>-DMSO)  
\*moisture in DMSO

24

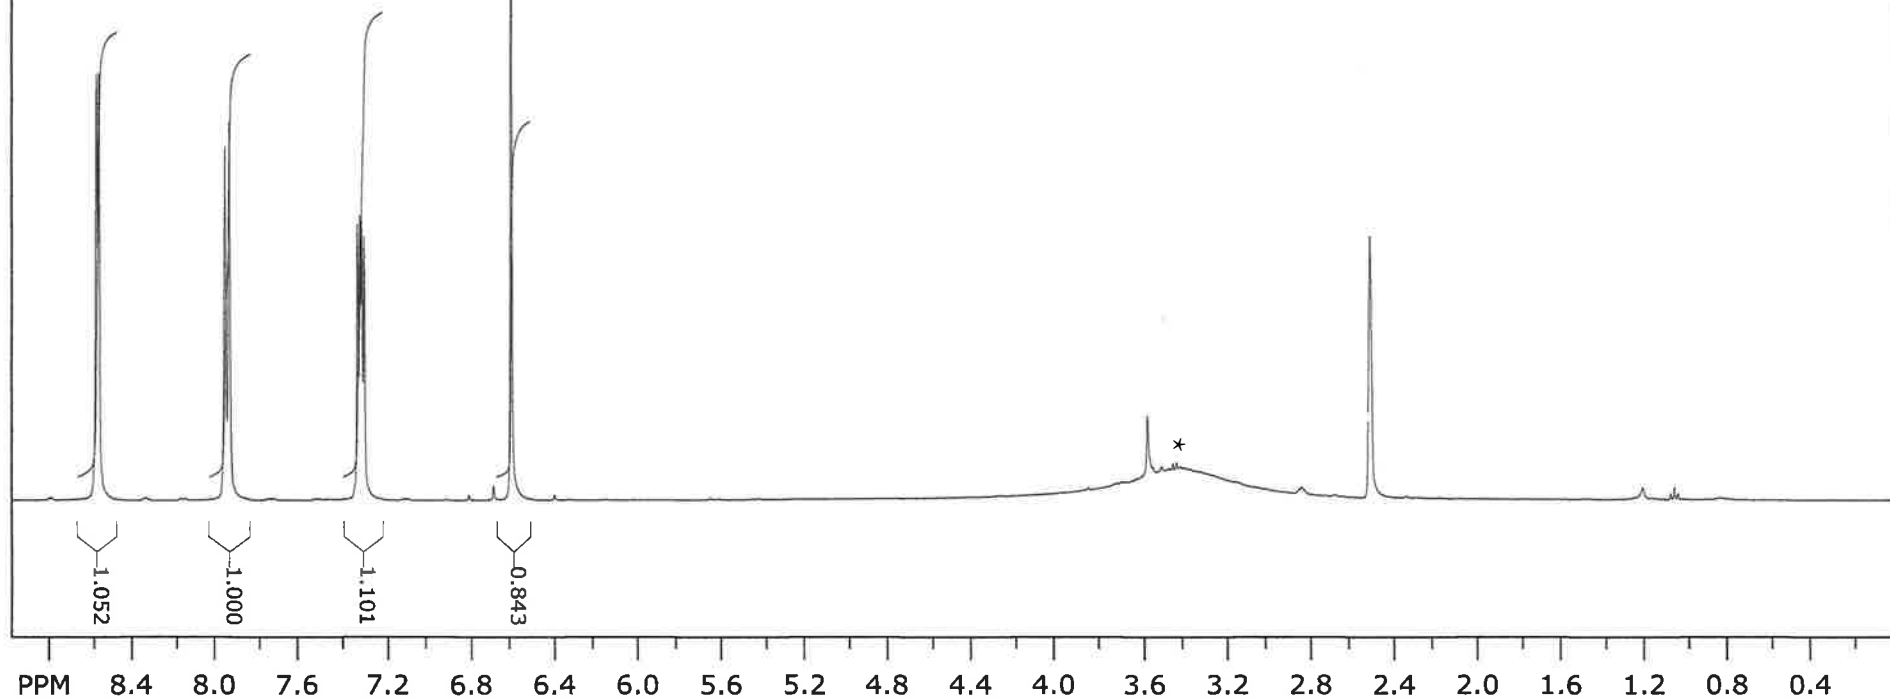

file: ...spectra\WD340-349\WD346-1H.fid\fid block# 1 expt: "s2pul"  
transmitter freq.: 399.732139 MHz  
time domain size: 32768 points  
width: 6410.26 Hz = 16.0364 ppm = 0.195626 Hz/pt  
number of scans: 8

freq. of 0 ppm: 399.729734 MHz  
processed size: 32768 complex points  
LB: 0.510 GF: 0.0000  
Hz/cm: 143.875 ppm/cm: 0.35993

# SpinWorks 4: new experiment

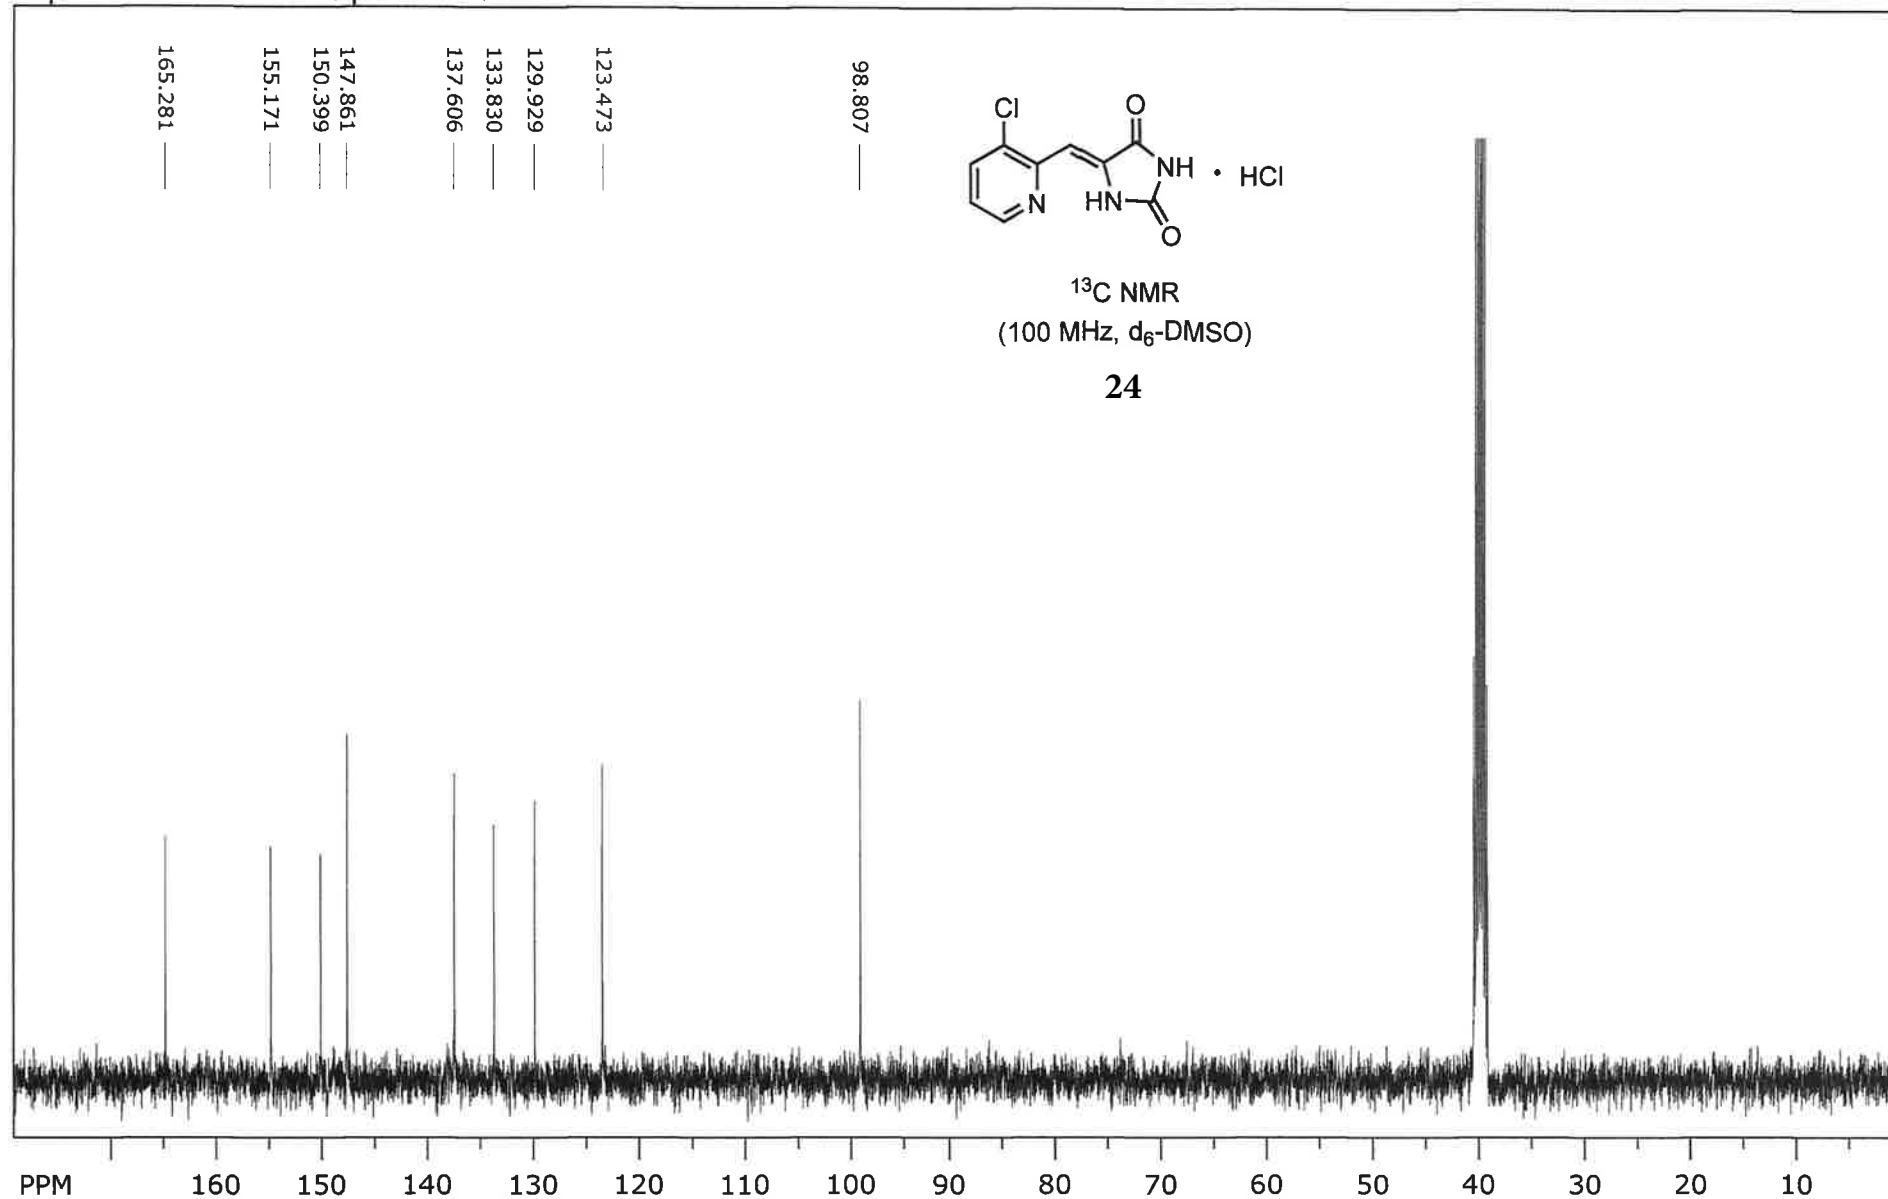

file: ...pectra\WD340-349\WD346-13C.fid\fid block# 1 expt: "s2pul"  
 transmitter freq.: 100.523180 MHz  
 time domain size: 65536 points  
 width: 25000.00 Hz = 248.6989 ppm = 0.381470 Hz/pt  
 number of scans: 512

freq. of 0 ppm: 100.512163 MHz  
 processed size: 65536 complex points  
 LB: 1.500 GF: 0.0000  
 Hz/cm: 723.333 ppm/cm: 7.19569

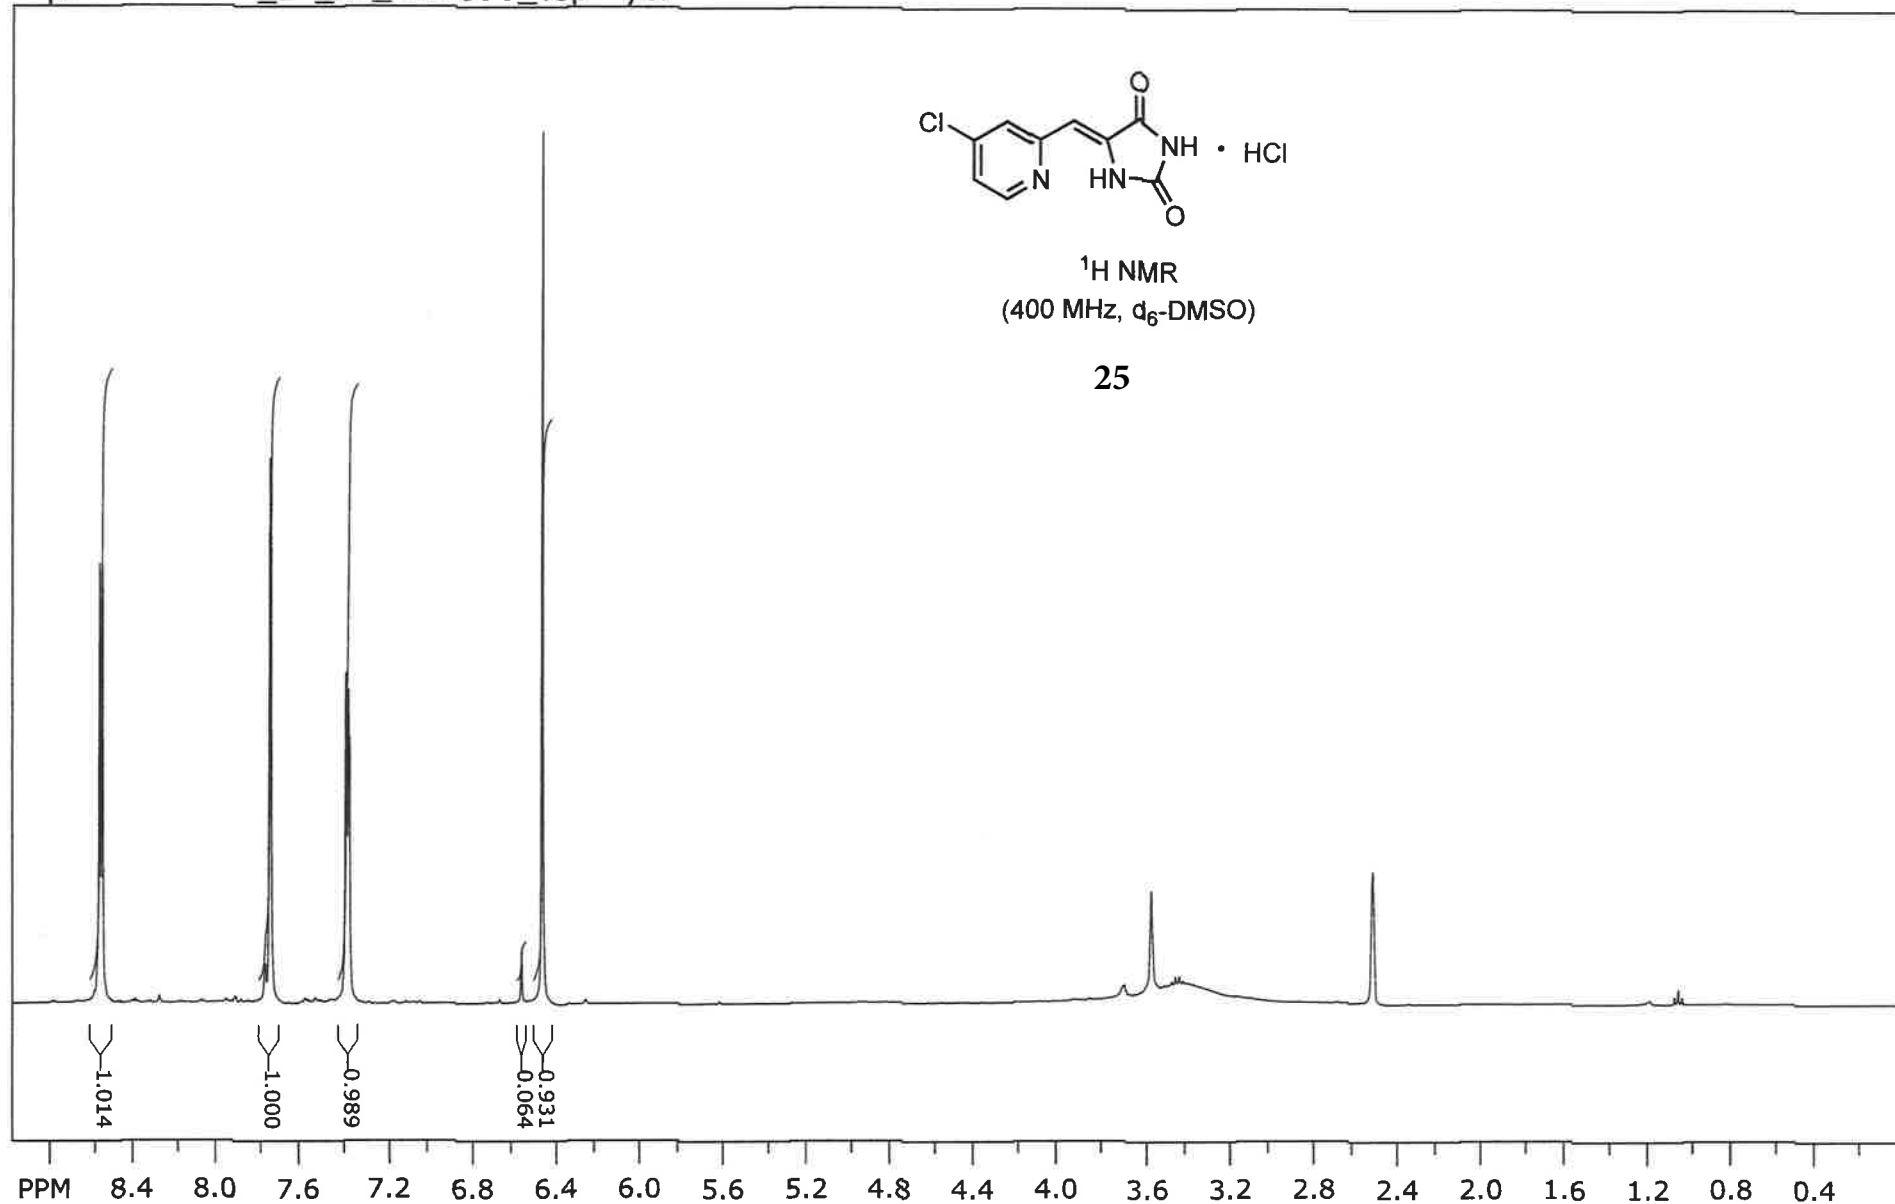

file: ...spectra\WD340-349\WD347-1H.fid\fid block# 1 expt: "s2pul"  
transmitter freq.: 399.732139 MHz  
time domain size: 32768 points  
width: 6410.26 Hz = 16.0364 ppm = 0.195626 Hz/pt  
number of scans: 8

freq. of 0 ppm: 399.729734 MHz  
processed size: 32768 complex points  
LB: 0.610 GF: 0.0000  
Hz/cm: 143.875 ppm/cm: 0.35993

# SpinWorks 4: new experiment

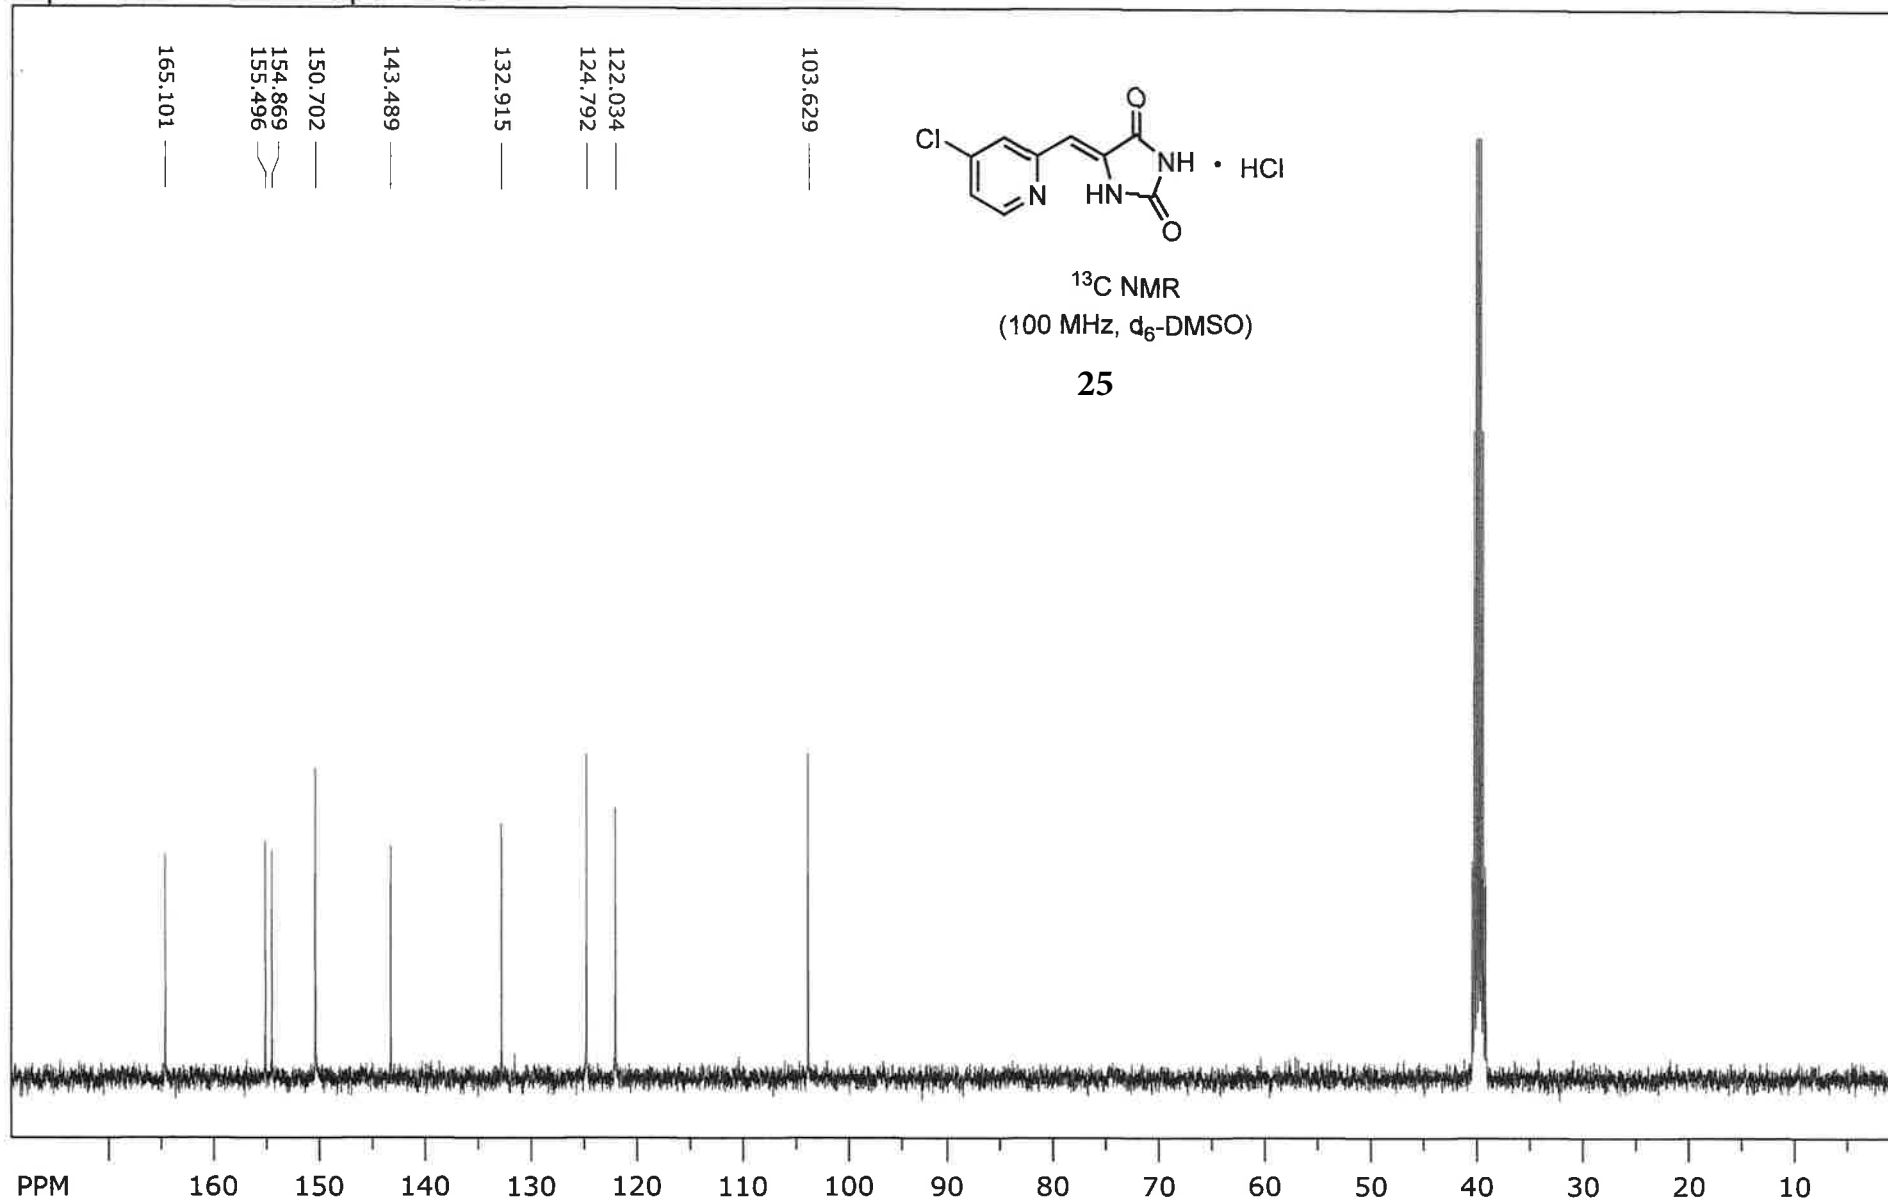

file: ...pectra\WD340-349\WD347-13C.fid\fid block# 1 expt: "s2pul"  
 transmitter freq.: 100.523180 MHz  
 time domain size: 65536 points  
 width: 25000.00 Hz = 248.6989 ppm = 0.381470 Hz/pt  
 number of scans: 512

freq. of 0 ppm: 100.512162 MHz  
 processed size: 65536 complex points  
 LB: 1.500 GF: 0.0000  
 Hz/cm: 723.333 ppm/cm: 7.19569

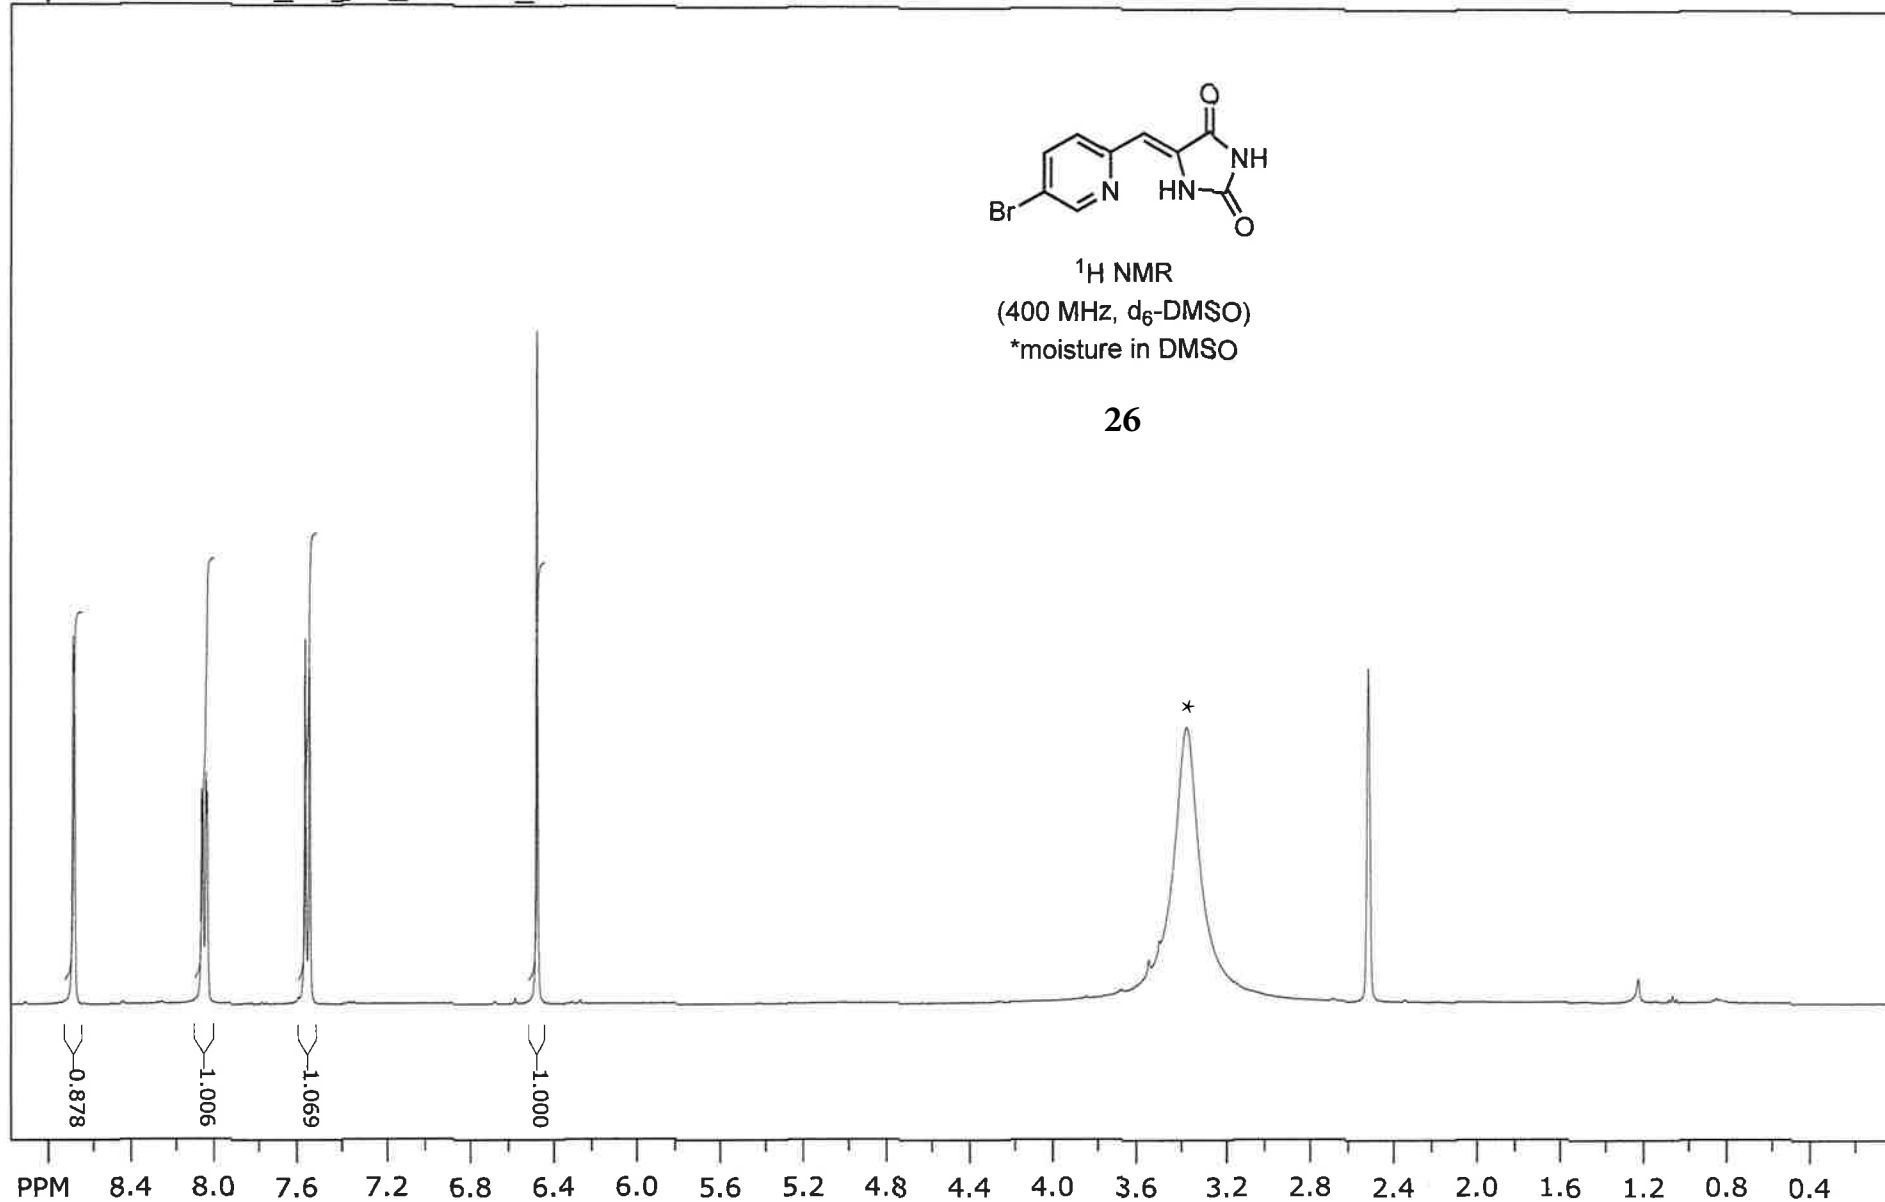

file: ...spectra\WD330-339\WD333-H1.fid\fid\_block# 1 expt: "s2pul"  
transmitter freq.: 399.732139 MHz  
time domain size: 32768 points  
width: 6410.26 Hz = 16.0364 ppm = 0.195626 Hz/pt  
number of scans: 8

freq. of 0 ppm: 399.729733 MHz  
processed size: 32768 complex points  
LB: 0.610 GF: 0.0000  
Hz/cm: 144.017 ppm/cm: 0.36028

# SpinWorks 4: wefarv

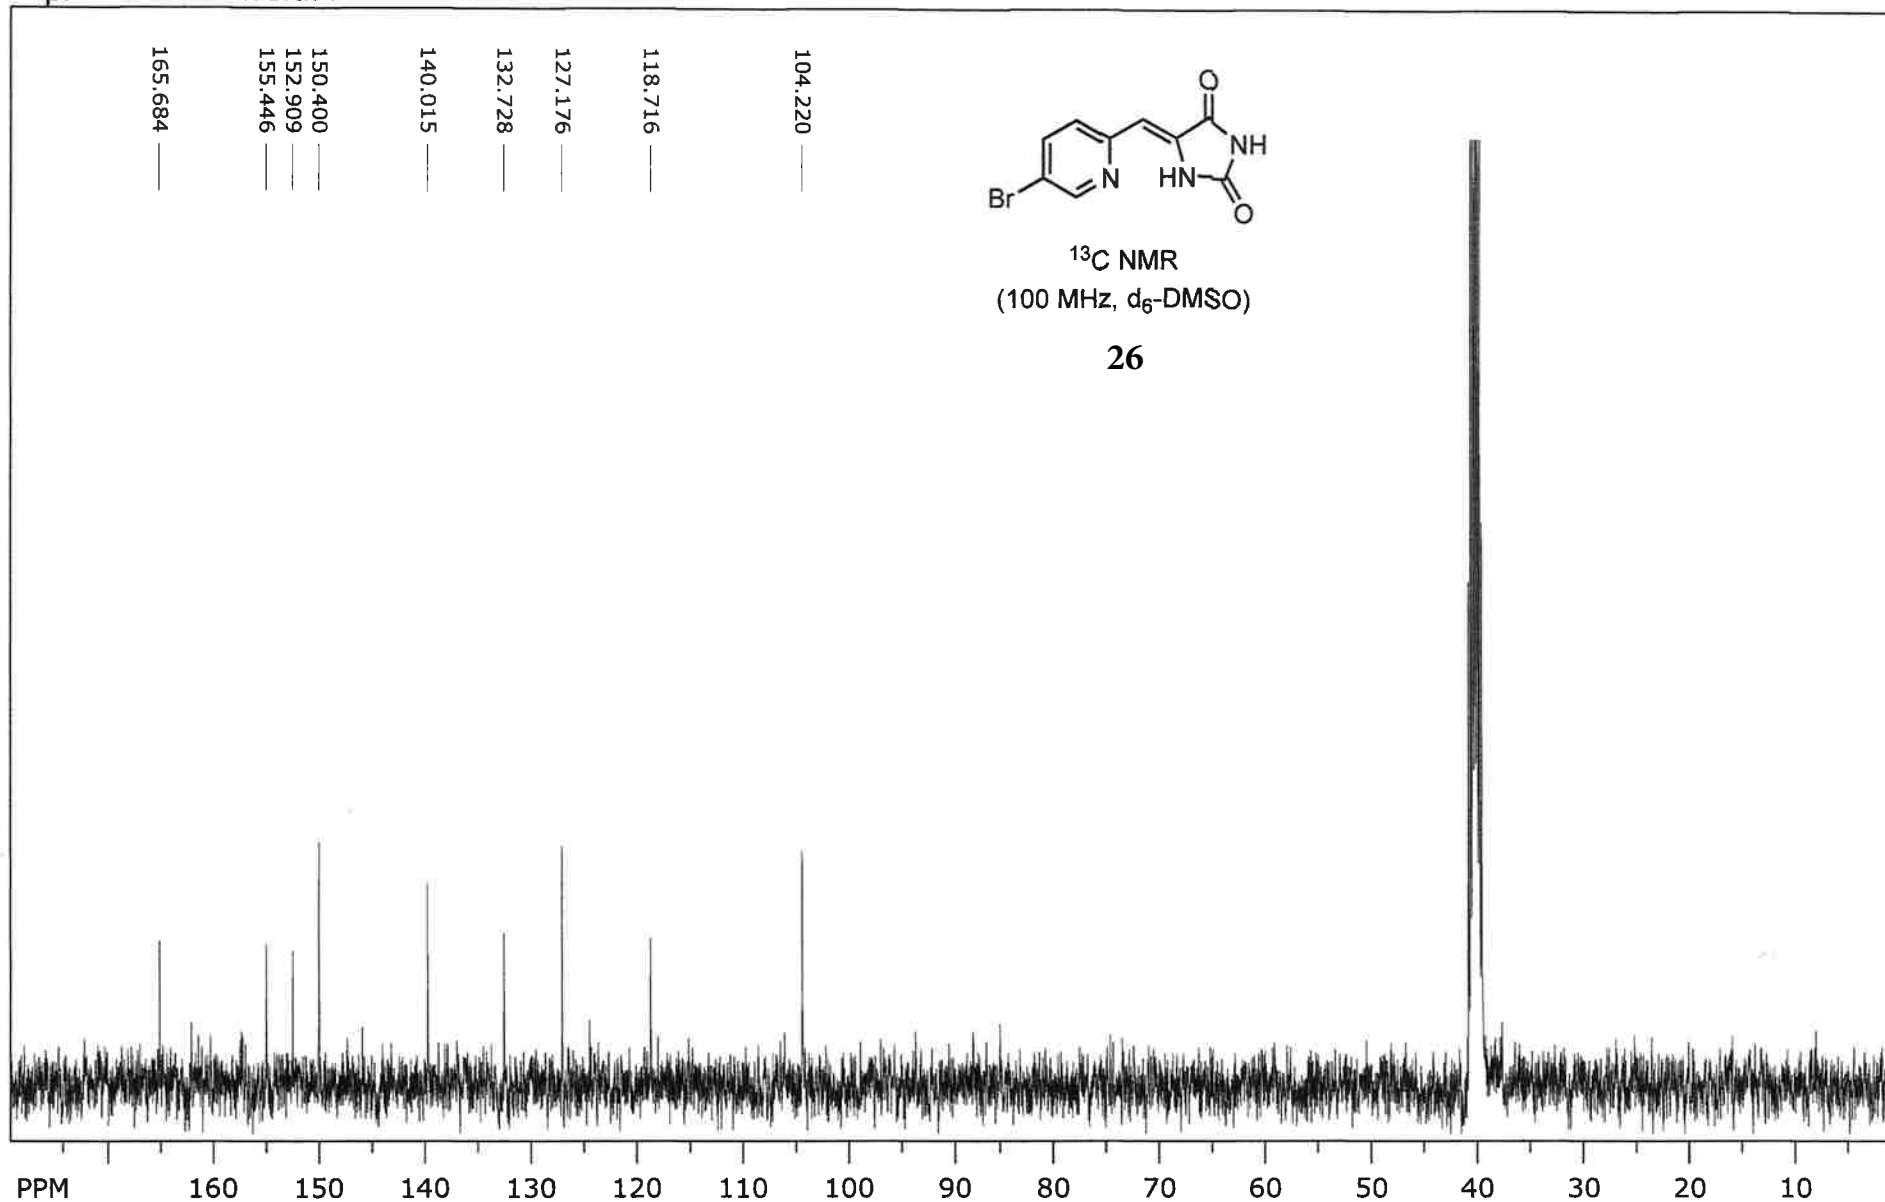

file: ...pectra\WD330-339\WD333-C13.fid\fid block# 1 expt: "s2pul"  
 transmitter freq.: 100.523180 MHz  
 time domain size: 65536 points  
 width: 25000.00 Hz = 248.6989 ppm = 0.381470 Hz/pt  
 number of scans: 256

freq. of 0 ppm: 100.512123 MHz  
 processed size: 65536 complex points  
 LB: 2.500 GF: 0.0000  
 Hz/cm: 723.889 ppm/cm: 7.20121

SpinWorks 4: STANDARD 1H OBSERVE - profile

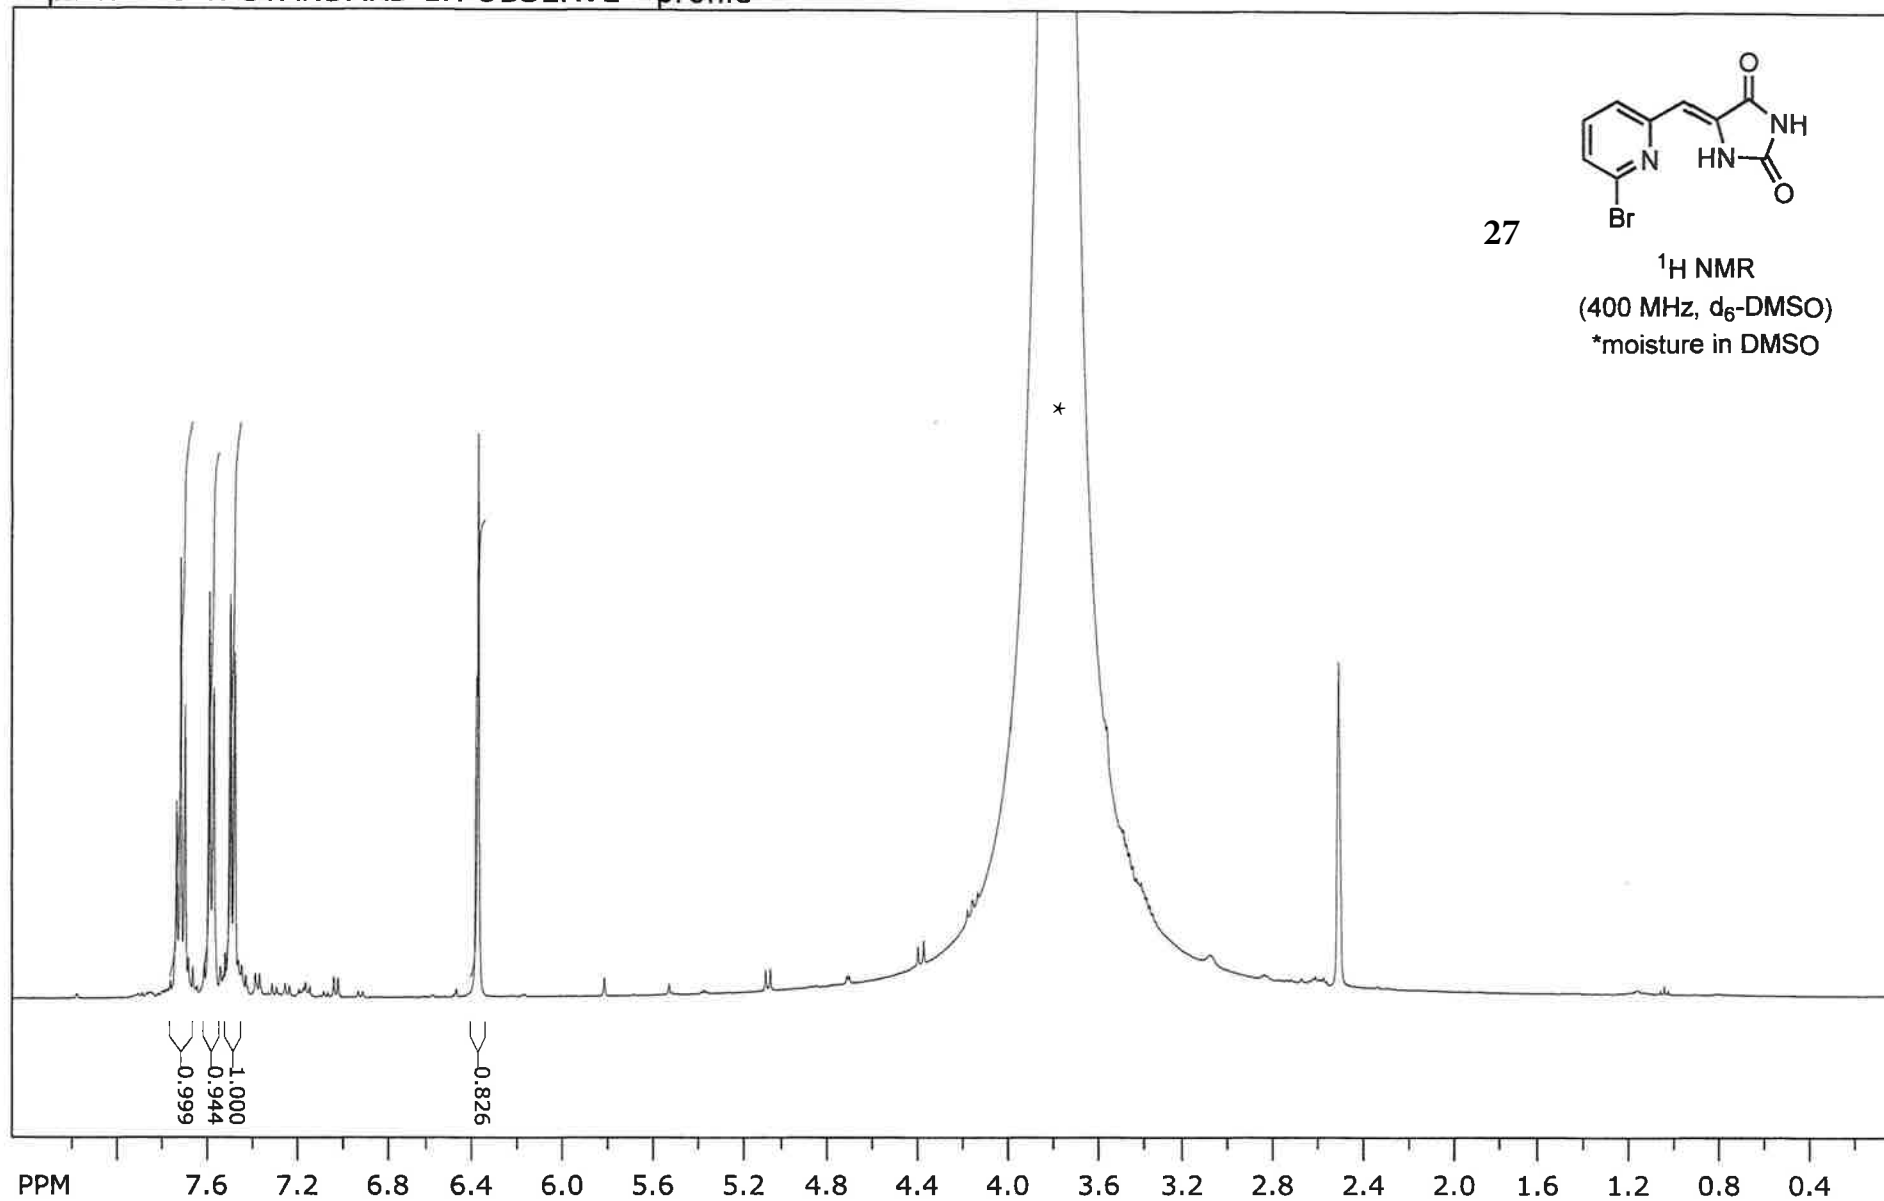

file: ...pectra\WD spectra\WD326\_1H.fid\fid block# 1 expt: "s2pul"  
 transmitter freq.: 399.732139 MHz  
 time domain size: 32768 points  
 width: 6410.26 Hz = 16.0364 ppm = 0.195626 Hz/pt  
 number of scans: 8

freq. of 0 ppm: 399.729734 MHz  
 processed size: 32768 complex points  
 LB: 0.506 GF: 0.0000  
 Hz/cm: 135.897 ppm/cm: 0.33997

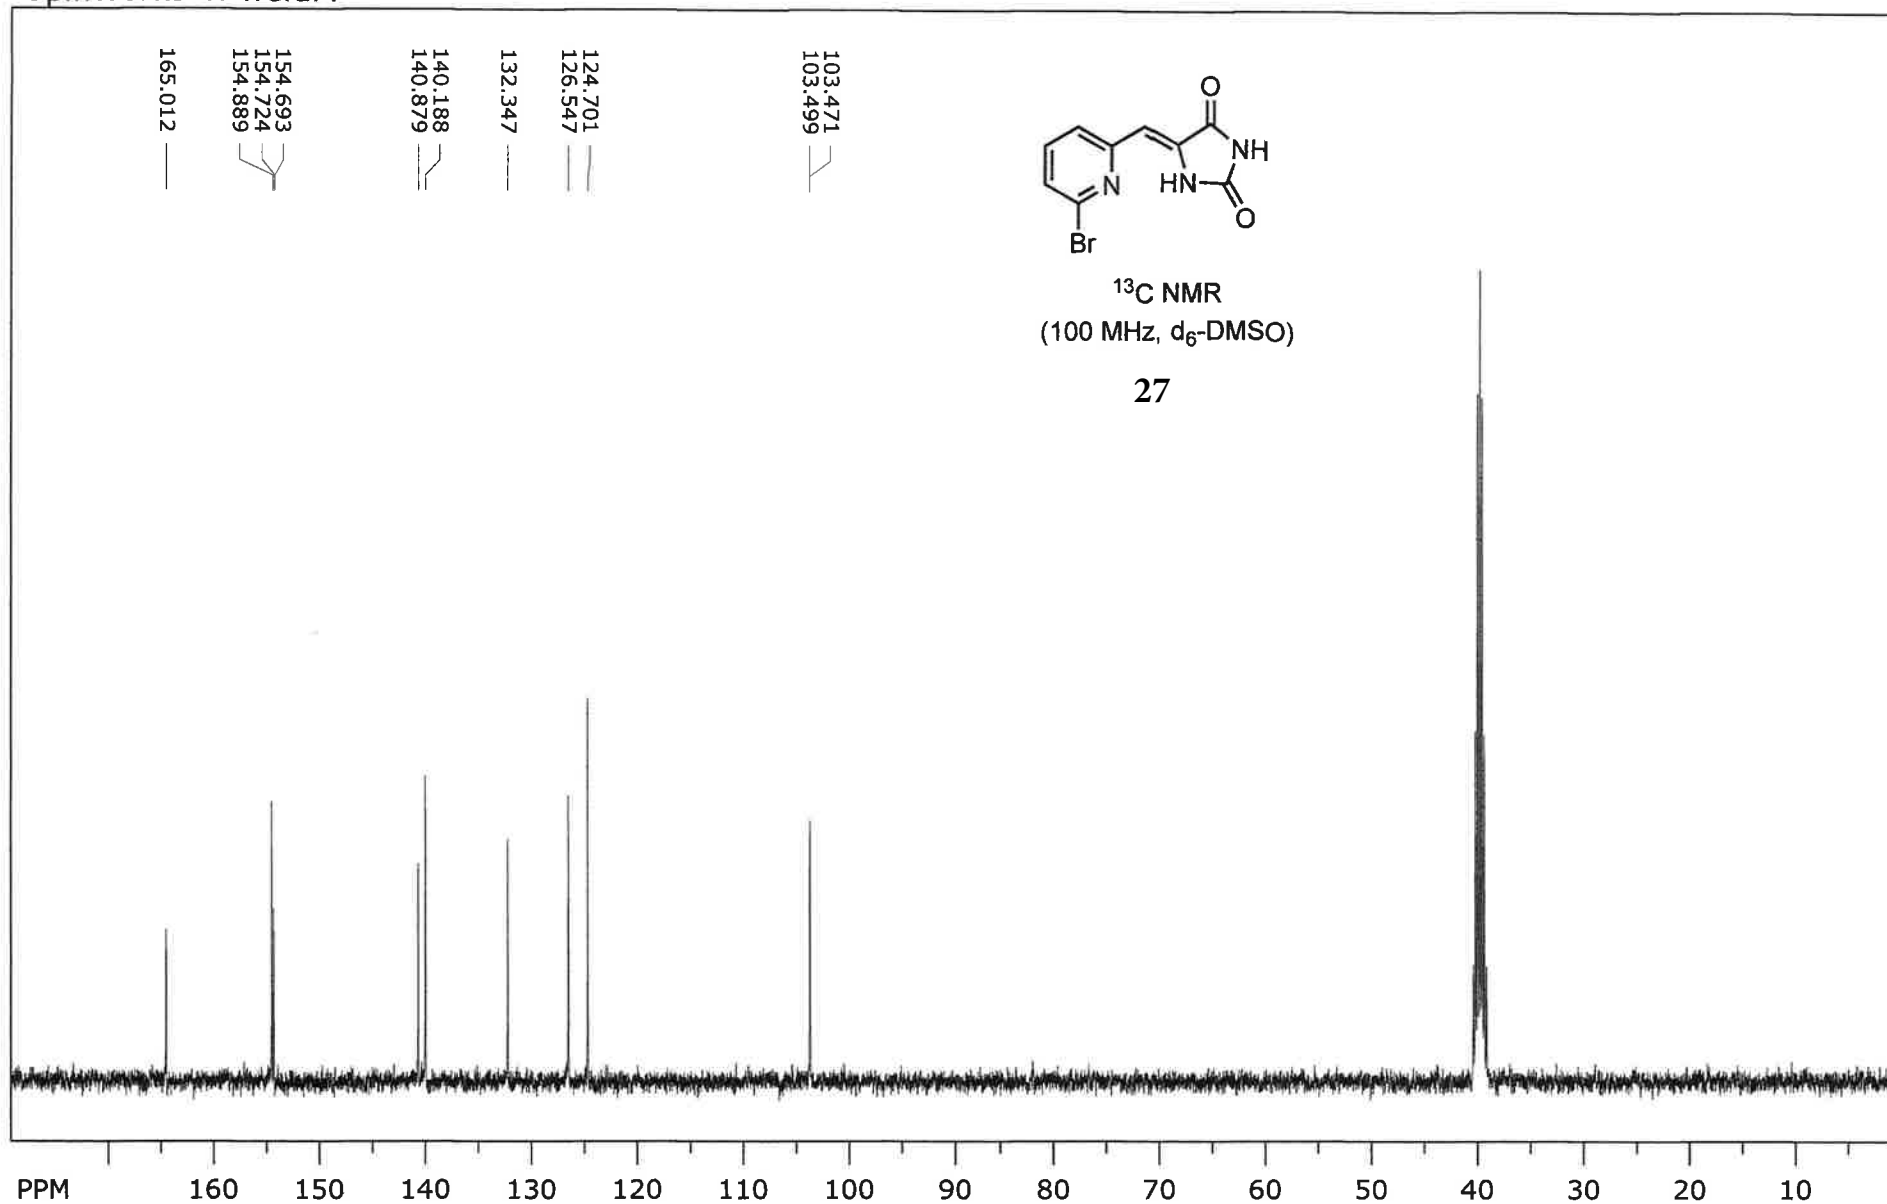

file: ...pectra\WD320-329\WD327-C13.fid\fid block# 1 expt: "s2pul"  
transmitter freq.: 100.523180 MHz  
time domain size: 65536 points  
width: 25000.00 Hz = 248.6989 ppm = 0.381470 Hz/pt  
number of scans: 256

freq. of 0 ppm: 100.512160 MHz  
processed size: 65536 complex points  
LB: 1.500 GF: 0.0000  
Hz/cm: 723.333 ppm/cm: 7.19569

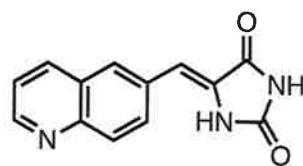

<sup>1</sup>H NMR  
(400 MHz, d<sub>6</sub>-DMSO)  
\*moisture in DMSO

28

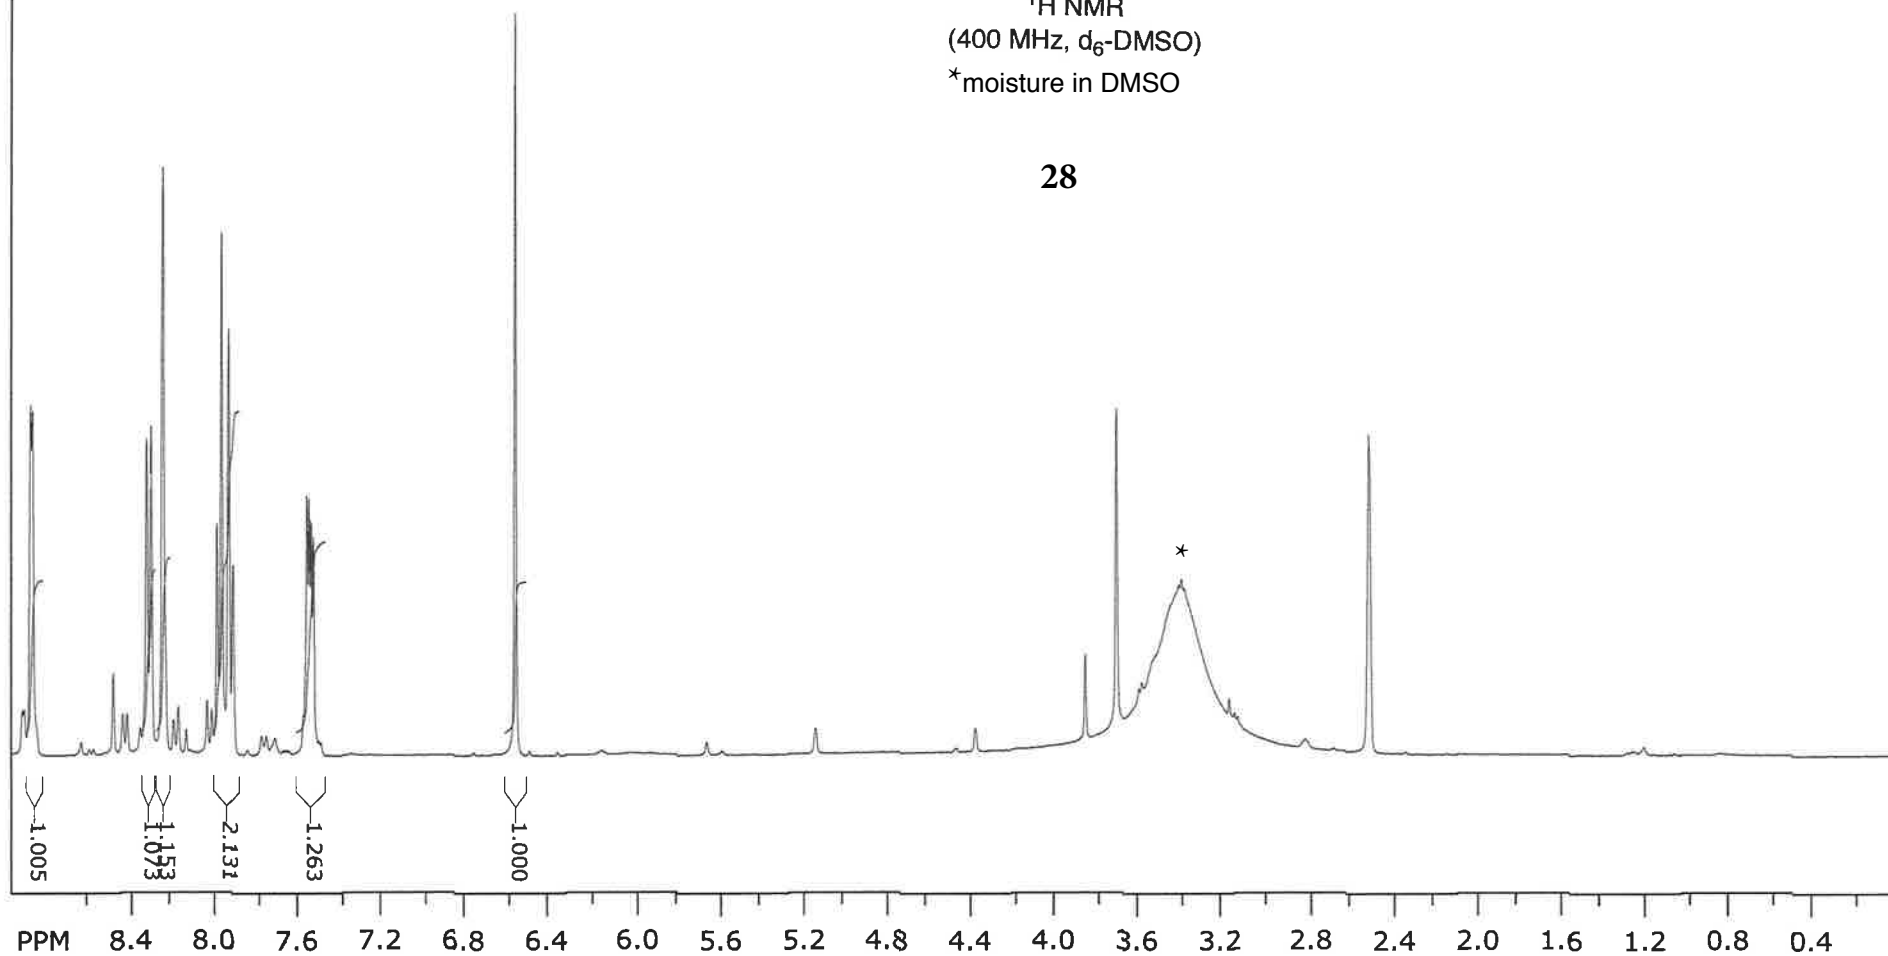

file: ...pectra\KG01-10\KG10-proton.fid\fid block# 1 expt: "s2pul"  
transmitter freq.: 399.732139 MHz  
time domain size: 32768 points  
width: 6410.26 Hz = 16.0364 ppm = 0.195626 Hz/pt  
number of scans: 8

freq. of 0 ppm: 399.729733 MHz  
processed size: 32768 complex points  
LB: 0.500 GF: 0.0000  
Hz/cm: 143.732 ppm/cm: 0.35957

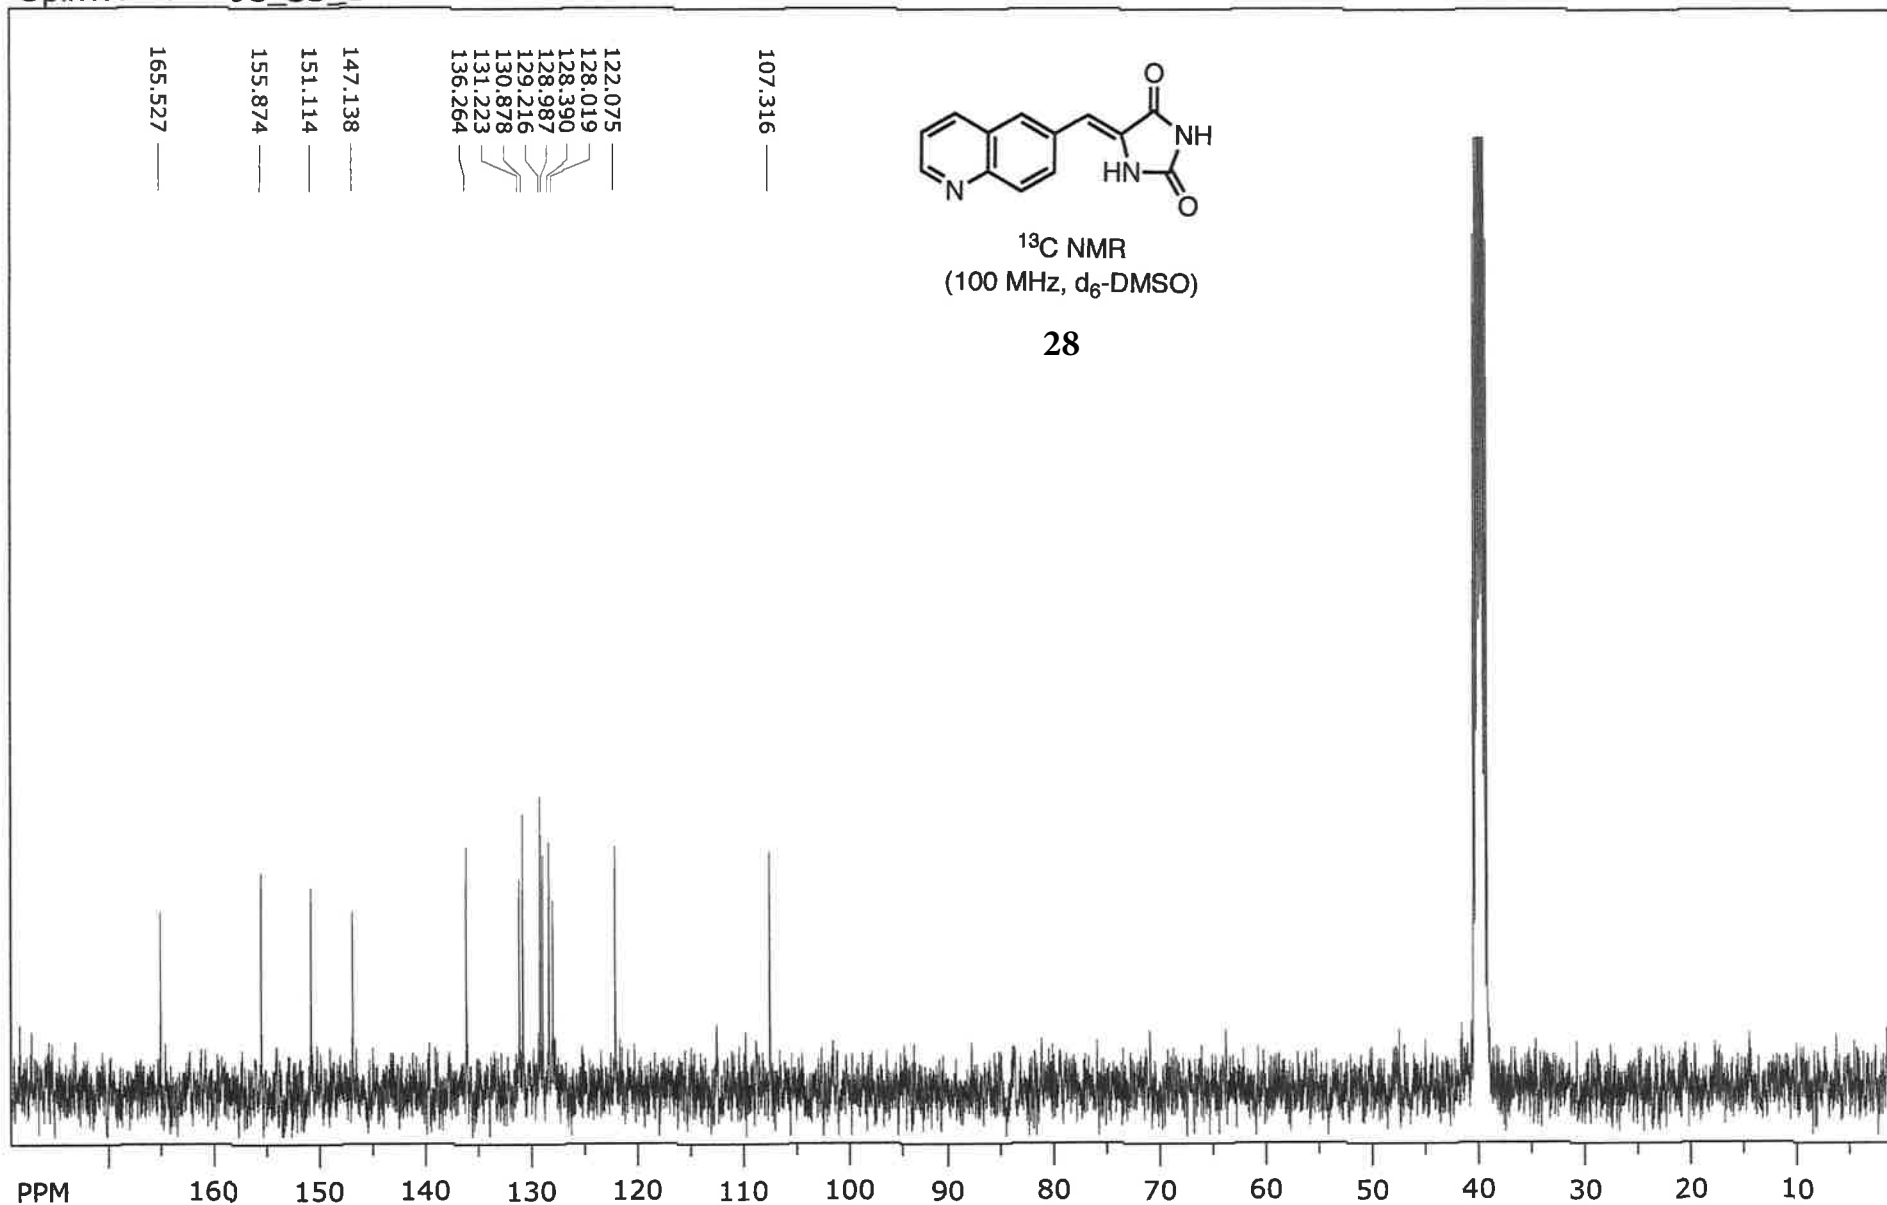

file: ...son\KG10\_13C\_DMSO\_20240118.fid\fid block# 1 expt: "s2pul"  
transmitter freq.: 100.523180 MHz  
time domain size: 65536 points  
width: 25000.00 Hz = 248.6989 ppm = 0.381470 Hz/pt  
number of scans: 2048

freq. of 0 ppm: 100.512162 MHz  
processed size: 65536 complex points  
LB: 2.500 GF: 0.0000  
Hz/cm: 723.333 ppm/cm: 7.19569

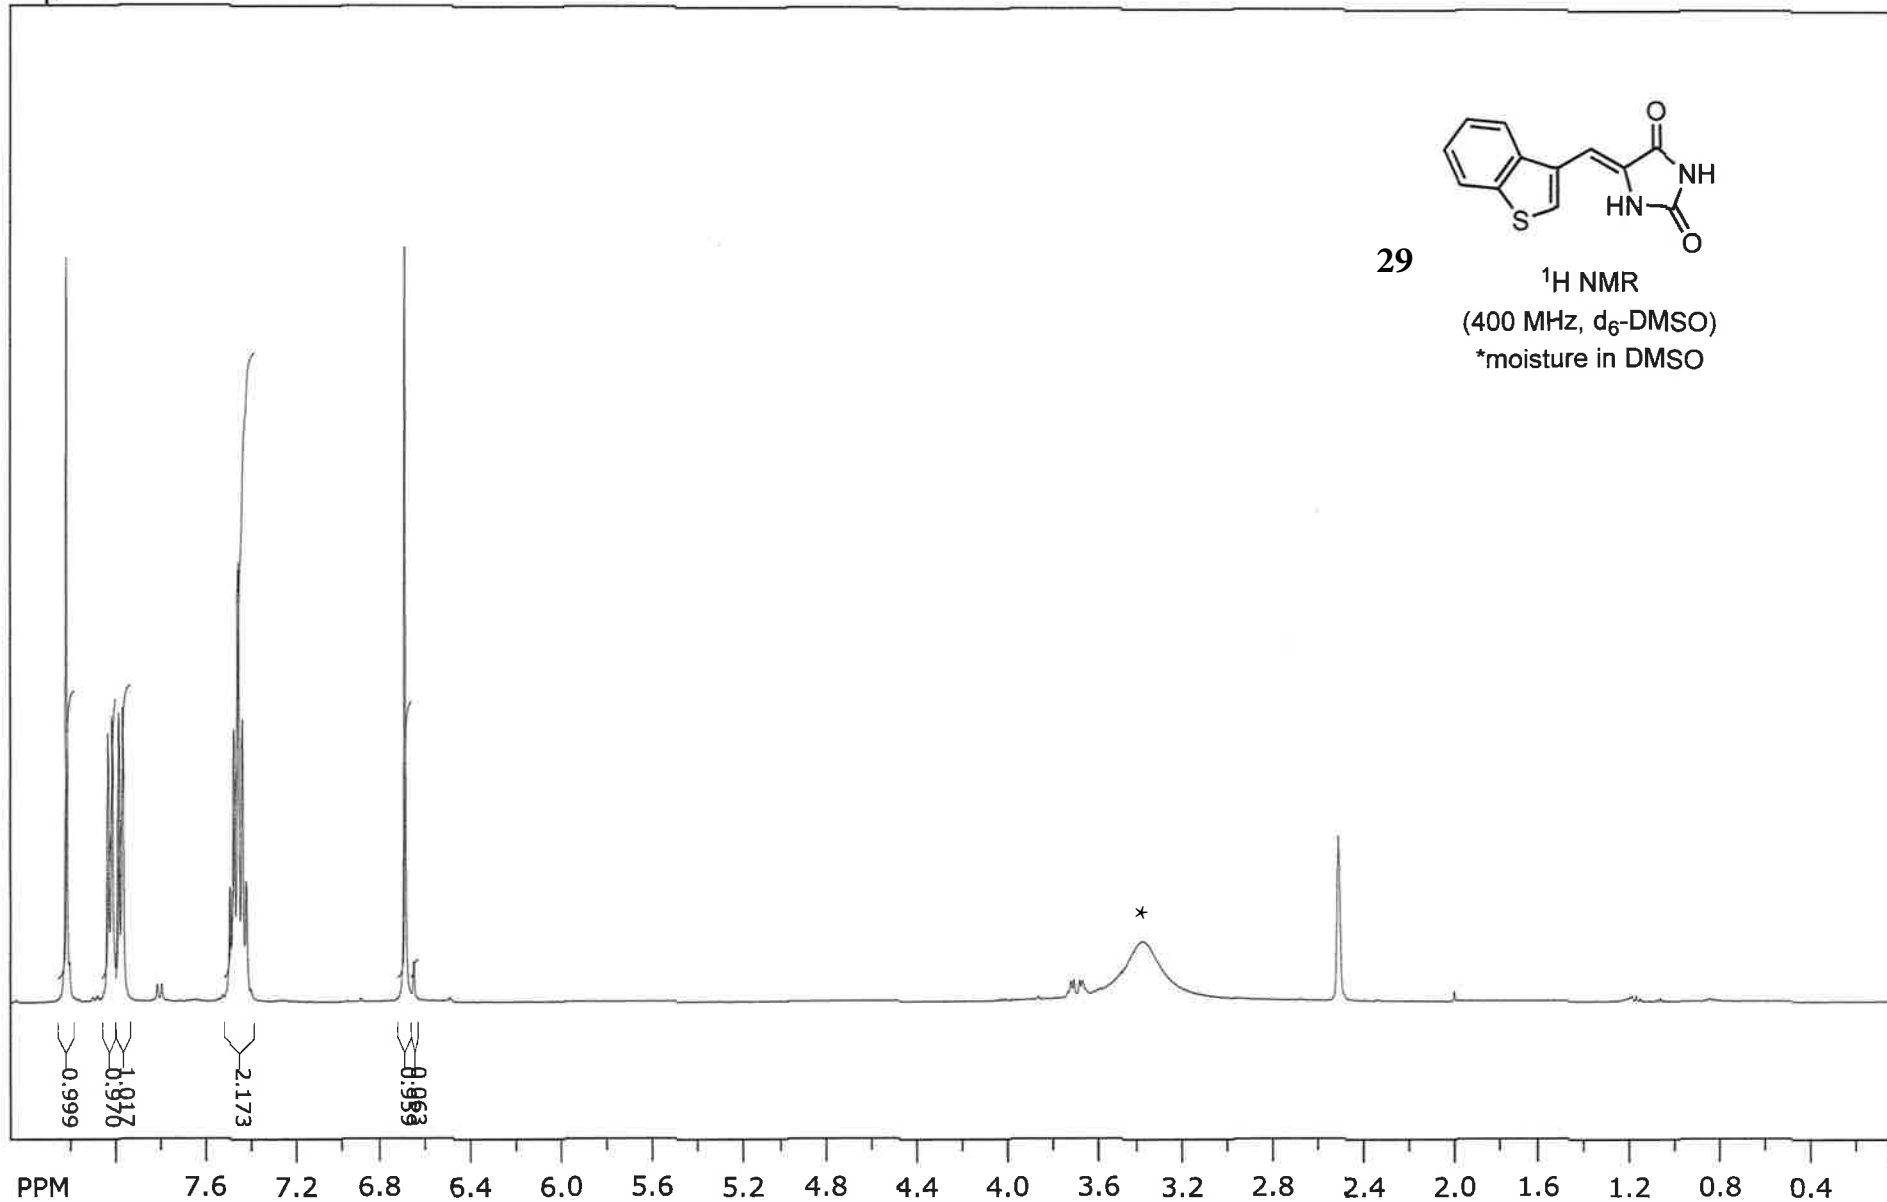

file: ...pectra\KG11-20\KG18-proton.fid\fid block# 1 expt: "s2pul"  
transmitter freq.: 399.732139 MHz  
time domain size: 32768 points  
width: 6410.26 Hz = 16.0364 ppm = 0.195626 Hz/pt  
number of scans: 8

freq. of 0 ppm: 399.729735 MHz  
processed size: 32768 complex points  
LB: 0.500 GF: 0.0000  
Hz/cm: 135.897 ppm/cm: 0.33997

SpinWorks 4: EAW1050\_carbon

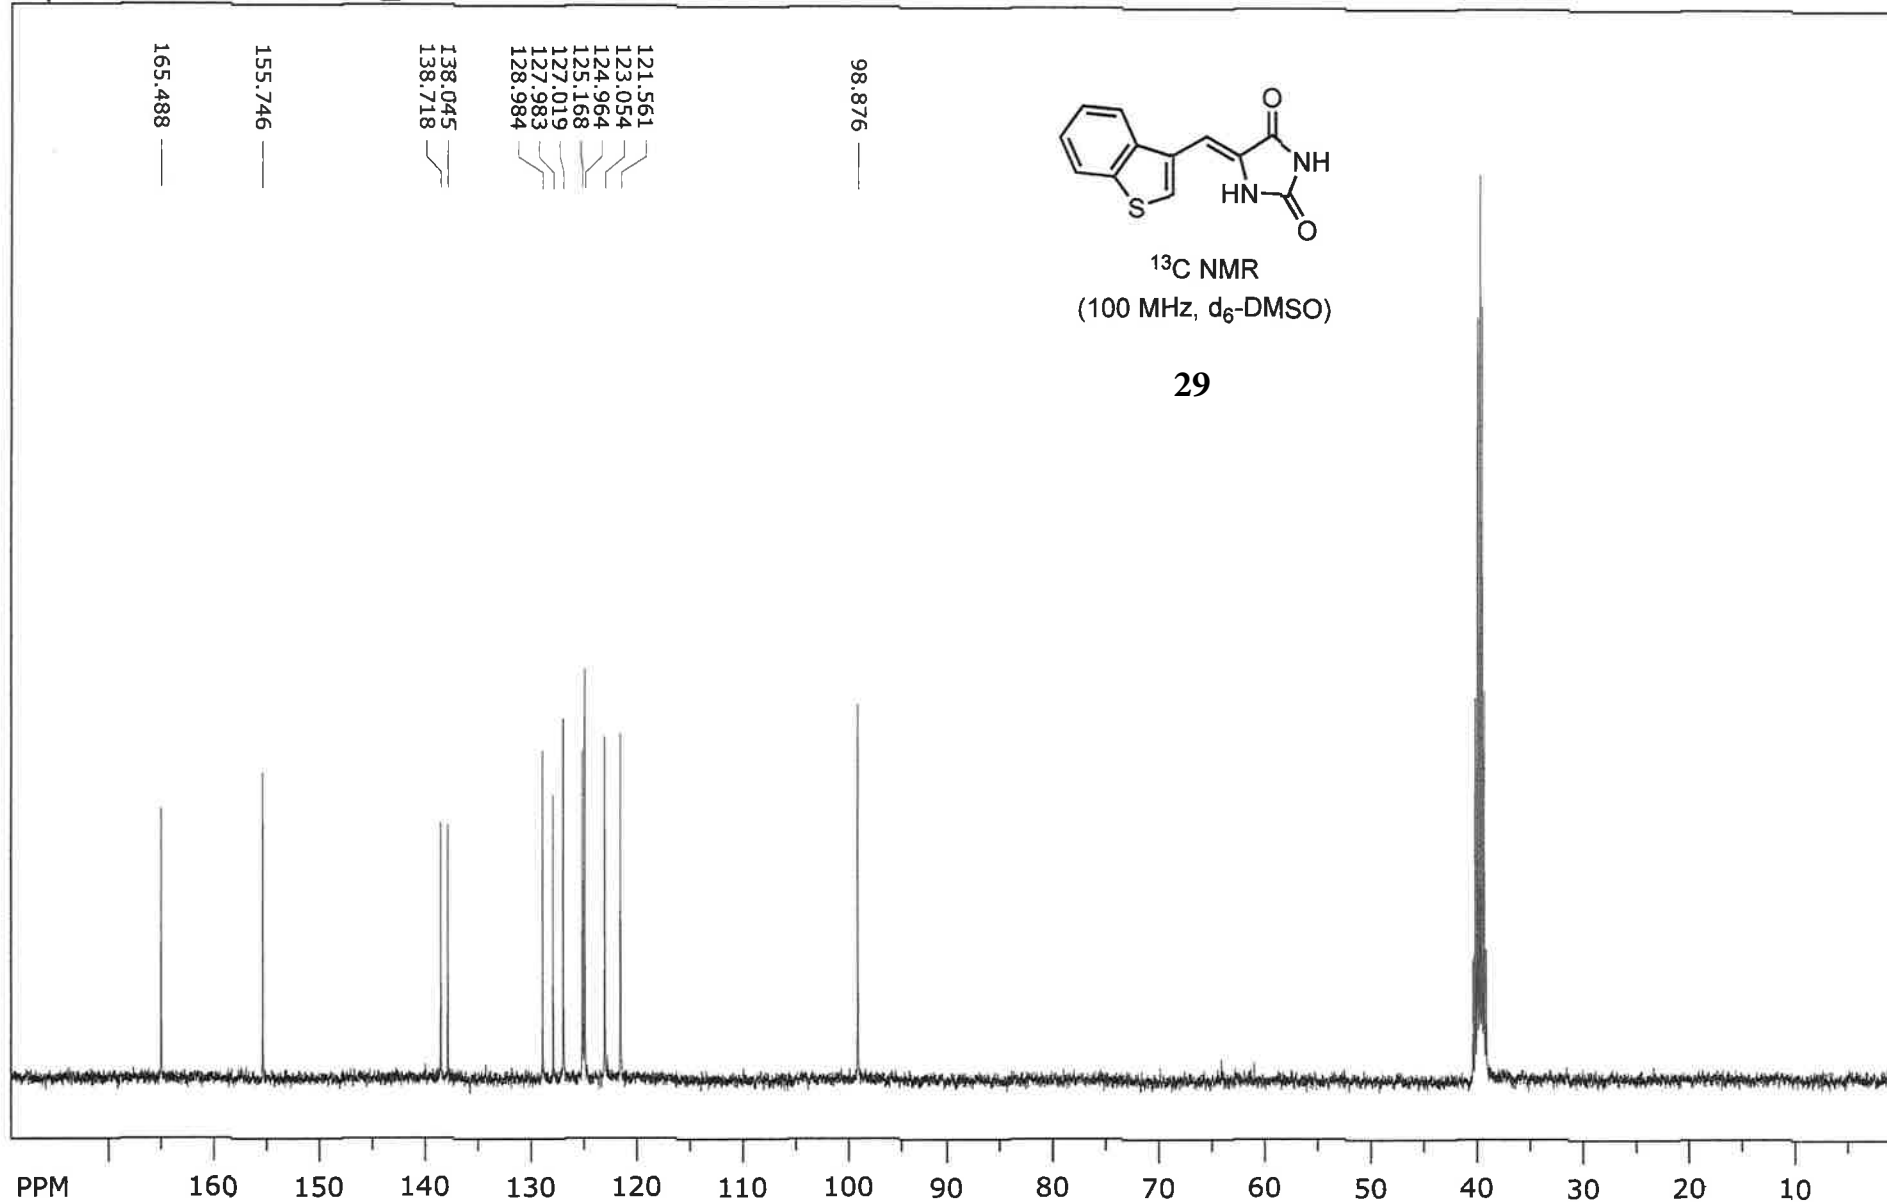

file: ...ldsonw\Desktop\KG18-carbon.fid\fid\_block# 1 expt: "s2pul"  
 transmitter freq.: 100.523180 MHz  
 time domain size: 65536 points  
 width: 25000.00 Hz = 248.6989 ppm = 0.381470 Hz/pt  
 number of scans: 256

freq. of 0 ppm: 100.512160 MHz  
 processed size: 65536 complex points  
 LB: 1.500 GF: 0.0000  
 Hz/cm: 723.333 ppm/cm: 7.19569
